# Supplementary material for: Sodium fluoride preserves blood metabolite integrity for biomarker discovery in large-scale, multi-site metabolomics investigations
Source: Royal Society of Chemistry journal article supplement (doi:10.1039/d3an01359f), 2024-01-01
Supplement: d3an01359f1.pdf [file d3an01359f1.pdf]

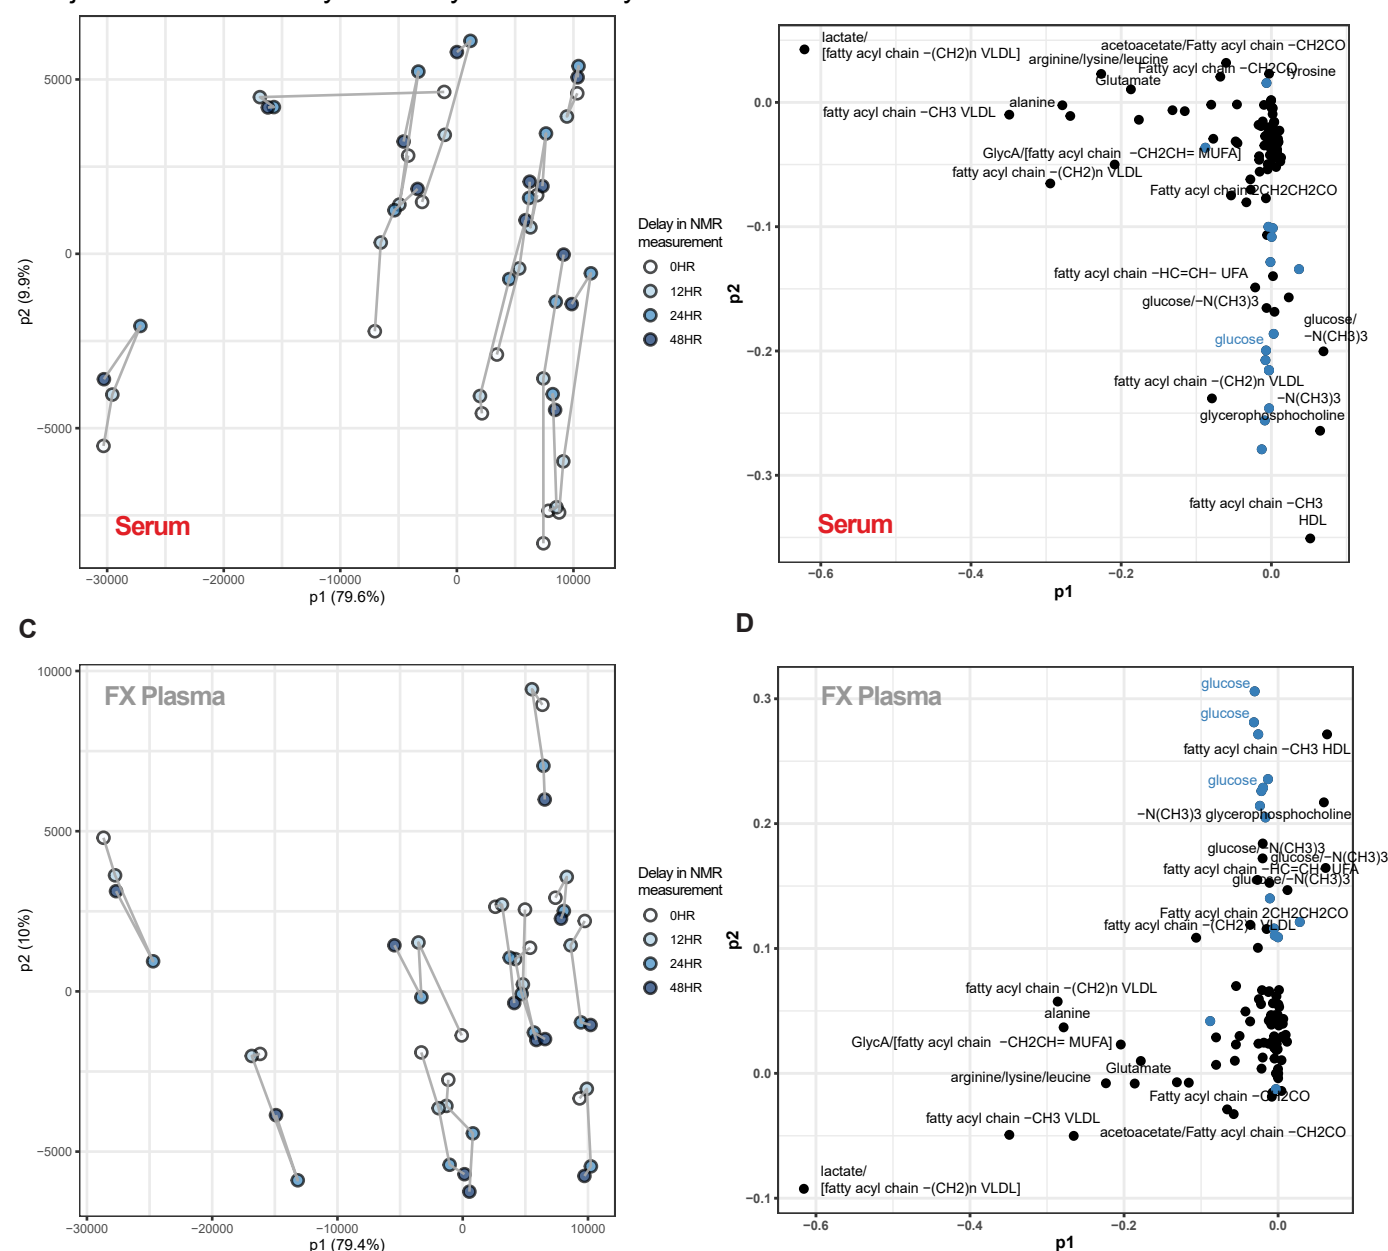

**Figure S1** Variation in the metabolome due to delayed sample measurement is small compared to interindividual variation in the healthy control cohort. (A, C) PCA scores plot demonstrating the effect of delayed NMR measurement on LH plasma samples. Each line connects samples from the same individual. (B, D) Loadings plot illustrating the metabolites that contribute to the variation observed in principal component 1 and 2.

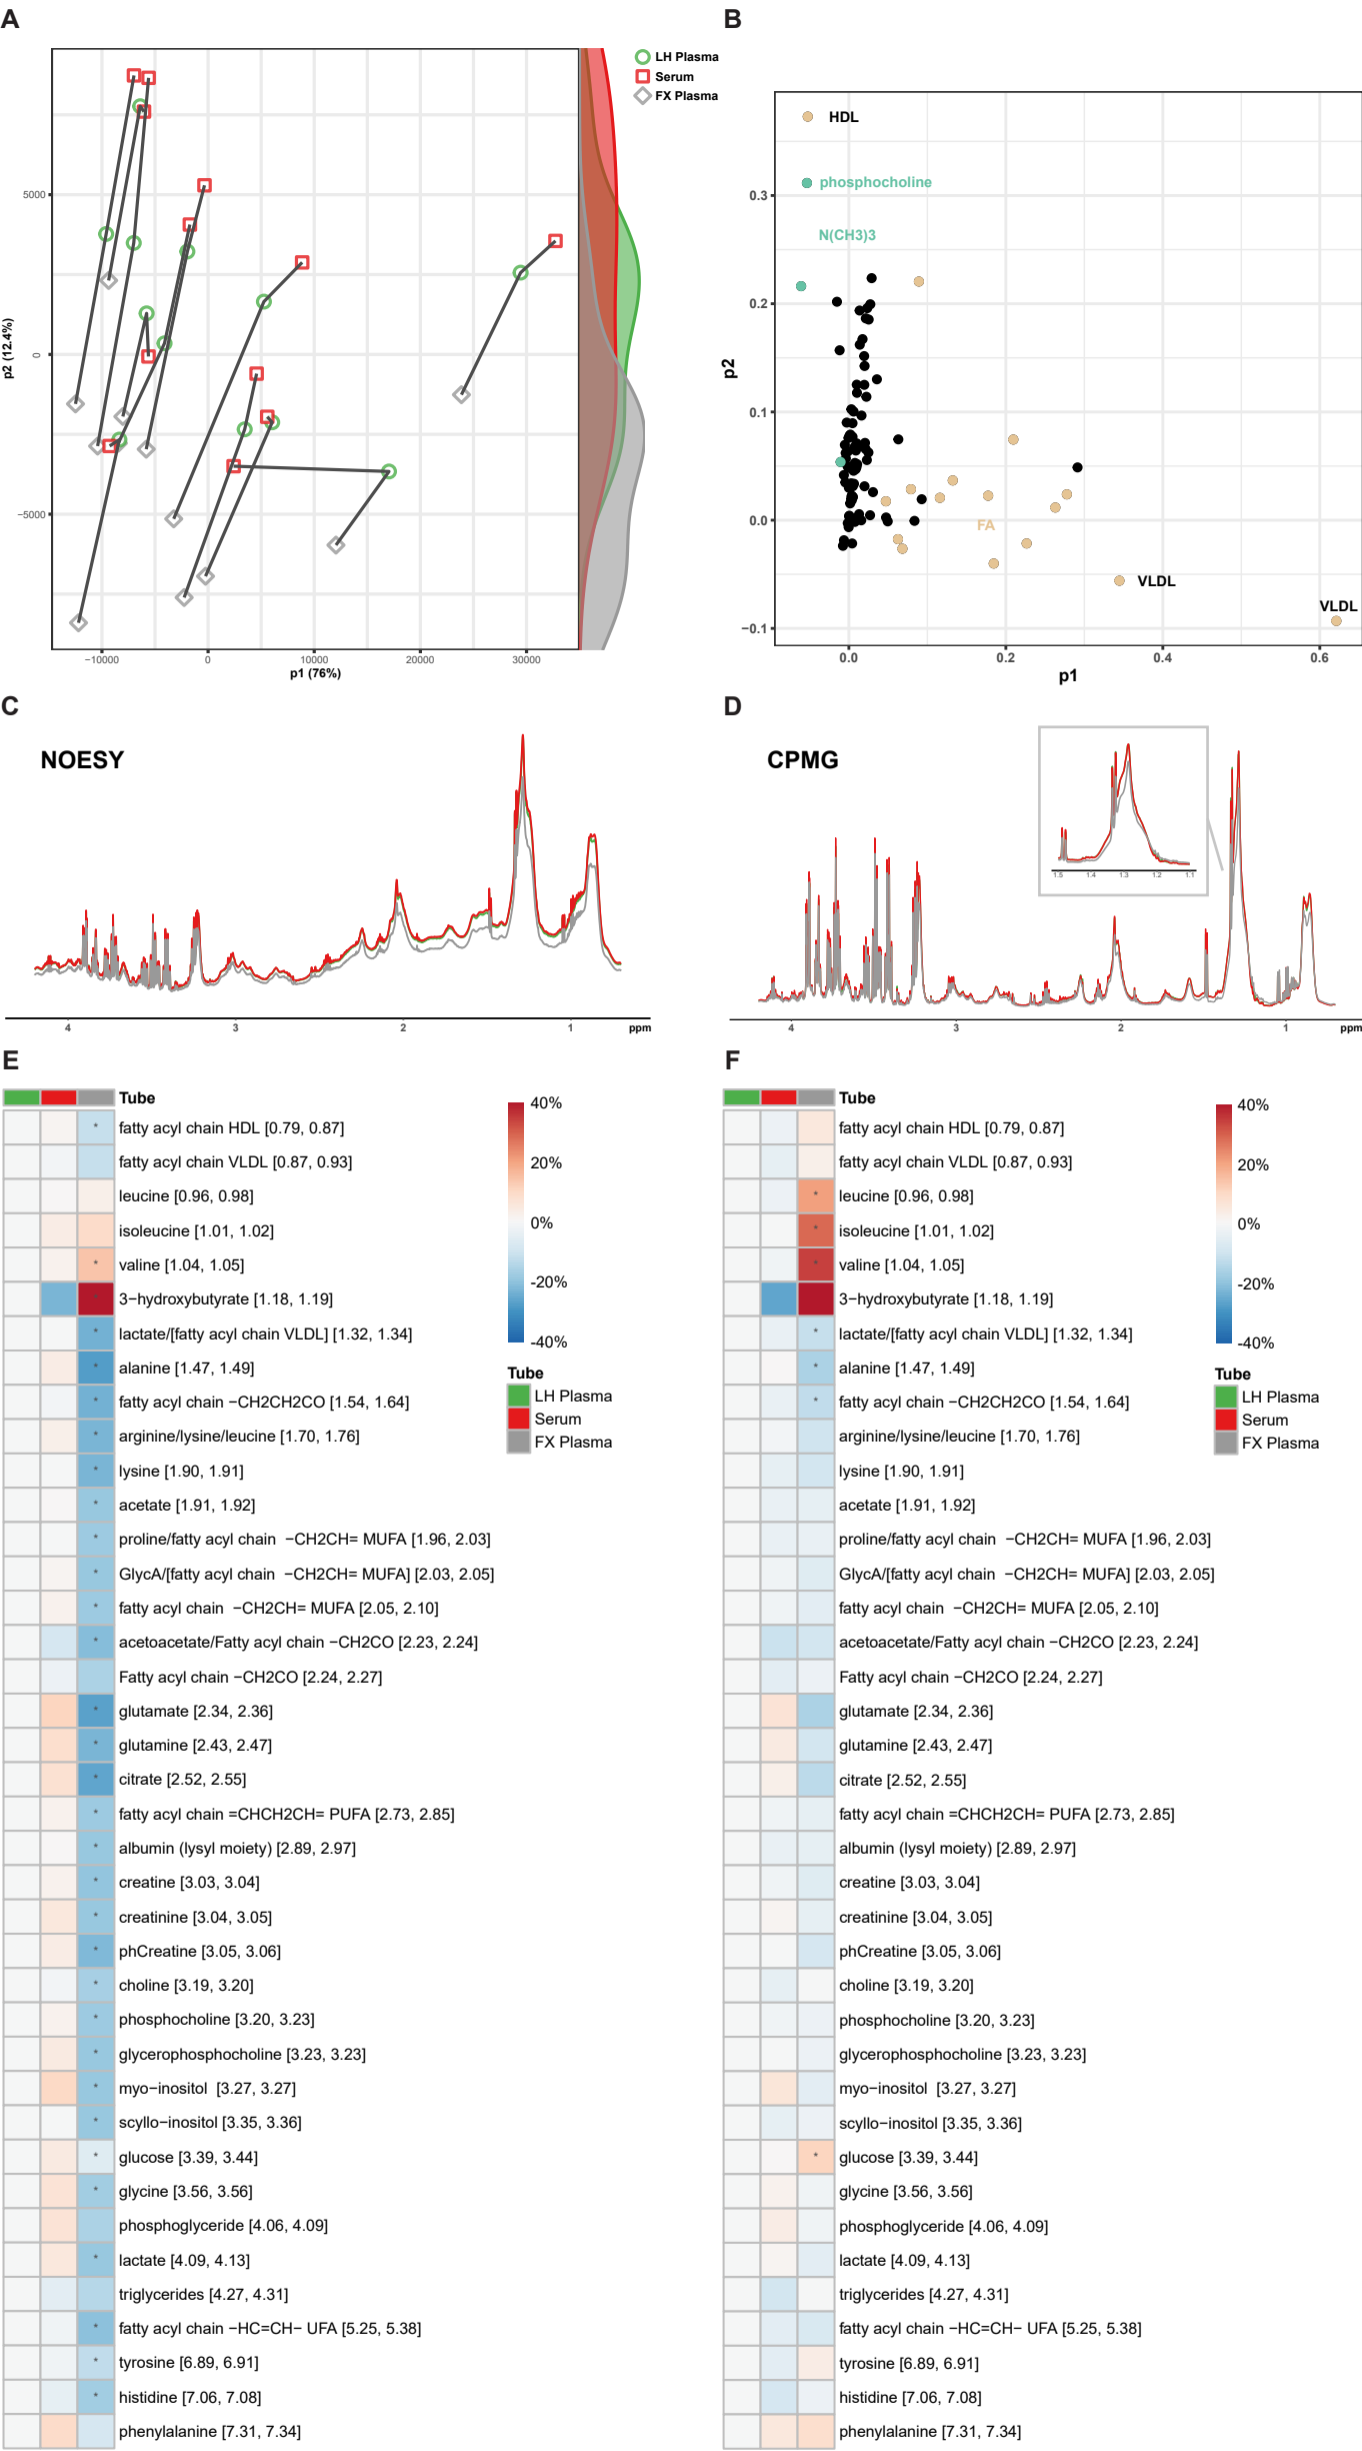

**A**

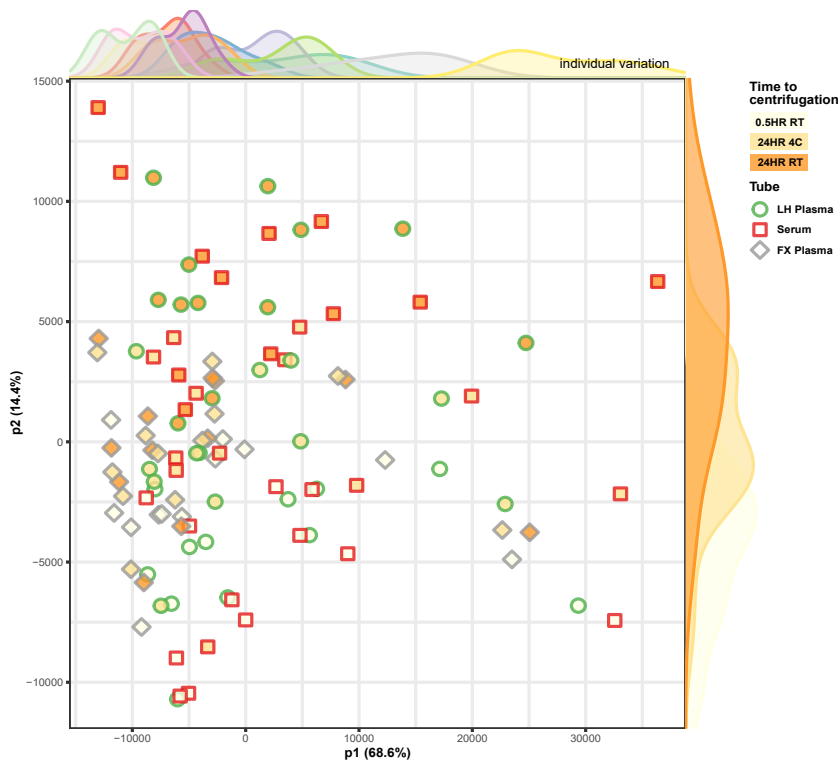

**B**

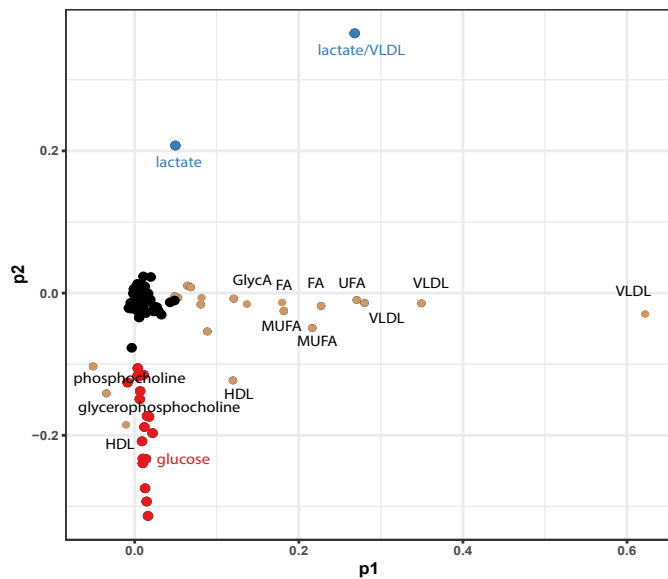

**Figure S3** (A) PCA scores plot demonstrating the influence of different pre-processing conditions on samples, specifically observed in PC2, whereas PC1 showing individual variation in metabolome. (B) Loadings plot of the PCA highlighting glucose and lactate as contributors to the variation observed in PC2.

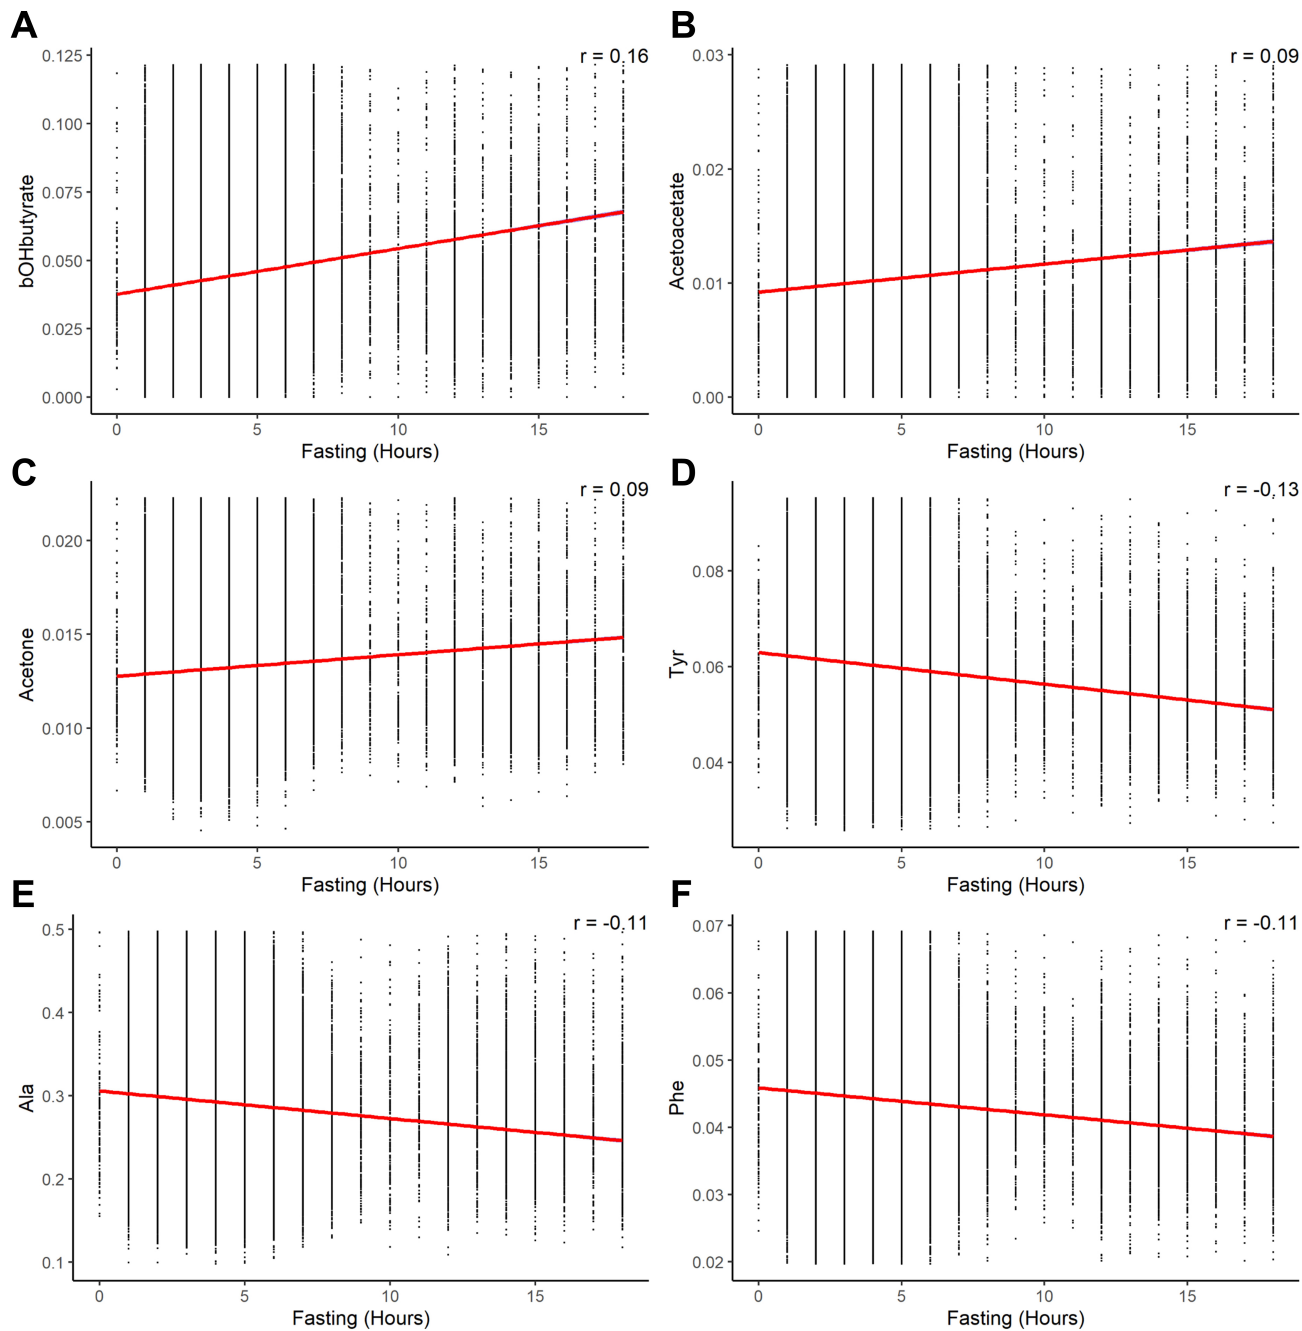

**Figure S4** Levels of certain metabolites, primarily ketone bodies, were correlated with fasting time.
