# Supplementary material for: Sodium fluoride preserves blood metabolite integrity for biomarker discovery in large-scale, multi-site metabolomics investigations
Source: Royal Society of Chemistry journal article supplement (doi:10.1039/d3an01359f), 2024-01-01
Supplement: d3an01359f4.xlsx [file d3an01359f4.xlsx]

## Sheet: abs
Spectral bin (ppm)	Assignment	LH Plasma							Serum							FX Plasma
		mean±SE				adjusted p value			mean±SE				adjusted p value			mean±SE				adjusted p value
		0HR	12HR	24HR	48HR	0HR vs 12HR	0HR vs 24HR	0HR vs 48HR	0HR	12HR	24HR	48HR	0HR vs 12HR	0HR vs 24HR	0HR vs 48HR	0HR	12HR	24HR	48HR	0HR vs 12HR	0HR vs 24HR	0HR vs 48HR
[0.79, 0.87]	fatty acyl chain HDL	1±0.04	0.98±0.03	0.98±0.03	0.93±0.03	1	1	0.177388	1±0.04	0.97±0.04	0.93±0.03	0.92±0.03	1	1	0.833003	1±0.05	0.96±0.04	0.9±0.03	0.89±0.04	1	0.995423	0.169926
[0.87, 0.93]	fatty acyl chain VLDL	1±0.14	0.99±0.14	0.91±0.14	0.91±0.13	1	0.000792607	0.00967541	1±0.14	1.05±0.15	0.99±0.15	1±0.16	1	1	1	1±0.15	1±0.15	0.99±0.14	1±0.15	1	1	1
[0.96, 0.98]	leucine	1±0.06	1±0.06	0.93±0.05	0.97±0.05	1	0.0126509	0.681	1±0.05	1.03±0.05	0.98±0.05	1.01±0.06	1	1	1	1±0.06	1.01±0.06	0.99±0.05	1.01±0.06	1	1	1
[1.01, 1.02]	isoleucine	1±0.05	1±0.05	0.95±0.06	0.98±0.04	1	0.0424369	0.99999	1±0.05	0.99±0.04	0.96±0.04	0.97±0.04	1	1	1	1±0.06	0.98±0.05	0.98±0.04	1.02±0.06	1	1	1
[1.04, 1.05]	valine	1±0.05	1±0.04	0.96±0.05	0.96±0.04	1	0.00473948	0.393365	1±0.05	0.99±0.04	0.95±0.04	0.96±0.03	1	1	1	1±0.04	0.97±0.04	0.96±0.03	0.99±0.05	1	0.995423	1
[1.18, 1.19]	3-hydroxybutyrate	1±0.14	1.01±0.13	1.19±0.15	0.9±0.09	1	0.778533	0.99999	1±0.11	0.95±0.13	1.01±0.11	0.83±0.09	1	1	1	1±0.05	0.87±0.05	0.93±0.05	0.93±0.06	1	1	1
[1.32, 1.34]	lactate/[fatty acyl chain VLDL]	1±0.14	0.99±0.14	0.9±0.13	0.92±0.14	1	0.00471202	0.00300632	1±0.14	1.05±0.15	0.99±0.15	1.02±0.16	1	1	1	1±0.17	1.03±0.17	0.97±0.15	0.99±0.17	1	1	1
[1.47, 1.49]	alanine	1±0.04	0.97±0.03	0.88±0.04	0.94±0.04	1	0.00237304	0.257059	1±0.03	1±0.03	0.92±0.04	0.96±0.04	1	0.347407	1	1±0.04	1.04±0.04	0.94±0.04	0.95±0.05	1	1	1
[1.54, 1.64]	fatty acyl chain -CH2CH2CO	1±0.16	0.96±0.16	0.84±0.14	0.88±0.16	1	0.0100418	0.016176	1±0.15	1.05±0.17	0.97±0.16	1.01±0.18	1	1	1	1±0.19	1.04±0.19	0.96±0.16	0.98±0.19	1	1	1
[1.70, 1.76]	arginine/lysine/leucine	1±0.02	0.97±0.03	0.86±0.04	0.95±0.03	1	0.0076223	0.99999	1±0.04	1±0.03	0.93±0.03	0.98±0.03	1	1	1	1±0.05	1.05±0.04	0.97±0.04	0.99±0.04	1	1	1
[1.90, 1.91]	lysine	1±0.04	0.97±0.03	0.9±0.04	0.91±0.03	1	0.000315665	0.00300632	1±0.04	1±0.04	0.93±0.04	0.93±0.04	1	0.776596	1	1±0.05	1.01±0.05	0.92±0.05	0.91±0.05	1	0.376077	0.235999
[1.91, 1.92]	acetate	1±0.02	0.97±0.02	0.93±0.03	0.94±0.02	1	0.00440633	0.0392199	1±0.03	0.98±0.03	0.94±0.03	0.94±0.03	1	0.872384	1	1±0.04	0.99±0.03	0.91±0.04	0.95±0.05	1	0.216342	1
[1.96, 2.03]	proline/fatty acyl chain -CH2CH= MUFA	1±0.08	0.97±0.08	0.91±0.08	0.88±0.07	1	0.000315665	0.000820005	1±0.08	1±0.08	0.94±0.08	0.93±0.08	1	1	1	1±0.08	0.99±0.08	0.93±0.08	0.93±0.09	1	0.0994393	0.235999
[2.03, 2.05]	GlycA/[fatty acyl chain -CH2CH= MUFA]	1±0.08	0.98±0.08	0.92±0.07	0.92±0.07	1	0.000792607	0.000820005	1±0.07	1.02±0.08	0.97±0.08	0.98±0.08	1	1	1	1±0.09	1.01±0.09	0.96±0.08	0.98±0.09	1	1	1
[2.05, 2.10]	fatty acyl chain -CH2CH= MUFA	1±0.11	1±0.11	0.9±0.09	0.97±0.11	1	0.0443738	0.99999	1±0.1	1.05±0.11	1±0.1	1.04±0.13	1	1	1	1±0.13	1.05±0.12	1±0.11	1.02±0.12	1	1	1
[2.23, 2.24]	acetoacetate/Fatty acyl chain -CH2CO	1±0.18	0.96±0.17	0.88±0.17	0.86±0.16	1	0.00473948	0.00895466	1±0.18	1.05±0.2	0.99±0.19	0.98±0.19	1	1	1	1±0.19	0.99±0.18	0.94±0.17	0.96±0.18	1	1	1
[2.24, 2.27]	fatty acyl chain -CH2CO	1±0.21	0.96±0.21	0.85±0.2	0.84±0.2	1	0.00274214	0.00177924	1±0.22	1.06±0.23	0.99±0.23	1.01±0.24	1	1	1	1±0.24	1.01±0.23	0.93±0.21	0.95±0.23	1	1	1
[2.34, 2.36]	glutamate	1±0.04	1.08±0.04	0.98±0.04	1.18±0.05	1	1	0.0849922	1±0.03	1.02±0.03	0.99±0.02	1.08±0.06	1	1	1	1±0.08	1.2±0.05	1.14±0.04	1.24±0.07	1	1	0.602115
[2.43, 2.47]	glutamine	1±0.02	0.95±0.02	0.84±0.03	0.89±0.03	1	0.000792607	0.0849922	1±0.04	0.98±0.03	0.91±0.03	0.94±0.03	1	0.249513	1	1±0.04	0.98±0.04	0.89±0.04	0.86±0.04	1	0.995423	0.544768
[2.52, 2.55]	citrate	1±0.02	0.98±0.03	0.86±0.05	0.96±0.03	1	0.014403	0.99999	1±0.04	0.97±0.03	0.9±0.03	0.95±0.03	1	0.872384	1	1±0.05	1.04±0.04	0.95±0.04	0.96±0.04	1	1	1
[2.73, 2.85]	fatty acyl chain =CHCH2CH= PUFA	1±0.09	0.98±0.09	0.89±0.07	0.94±0.09	1	0.00450097	0.0483783	1±0.08	1.03±0.09	0.98±0.09	0.99±0.11	1	1	1	1±0.11	1.02±0.1	0.95±0.09	0.93±0.1	1	1	1
[2.89, 2.97]	albumin (lysyl moiety)	1±0.01	0.97±0.02	0.92±0.02	0.94±0.01	1	0.0038363	0.0225777	1±0.01	0.98±0.02	0.93±0.01	0.92±0.01	1	0.0112986	0.576084	1±0.02	1±0.02	0.94±0.02	0.9±0.02	1	1	0.202103
[3.03, 3.04]	creatine	1±0.03	0.99±0.03	0.92±0.03	0.97±0.03	1	0.000792607	0.381305	1±0.03	1±0.03	0.95±0.03	0.96±0.03	1	1	1	1±0.03	0.99±0.04	0.96±0.03	0.95±0.04	1	1	1
[3.04, 3.05]	creatinine	1±0.02	1±0.02	0.92±0.01	0.95±0.02	1	0.00237304	0.0510675	1±0.02	0.98±0.02	0.92±0.01	0.92±0.02	1	0.0895881	0.576084	1±0.02	1.01±0.01	0.96±0.02	0.95±0.02	1	1	1
[3.05, 3.06]	phCreatine	1±0.01	1±0.02	0.92±0.02	0.99±0.02	1	0.0100418	0.99999	1±0.03	1±0.02	0.95±0.02	0.95±0.02	1	1	1	1±0.03	1.01±0.03	0.99±0.02	0.97±0.03	1	1	1
[3.19, 3.20]	choline	1±0.05	0.98±0.04	0.99±0.05	0.94±0.04	1	1	0.99999	1±0.04	0.96±0.05	0.92±0.05	0.87±0.04	1	1	0.926448	1±0.06	0.95±0.05	0.9±0.04	0.87±0.04	1	1	0.235999
[3.20, 3.23]	phosphocholine	1±0.05	0.96±0.04	0.92±0.03	0.9±0.04	1	0.0162244	0.00663111	1±0.05	0.95±0.04	0.89±0.04	0.88±0.03	1	0.00560276	0.0669582	1±0.05	0.96±0.04	0.9±0.04	0.89±0.04	1	0.111792	0.0246682
[3.23, 3.23]	glycerophosphocholine	1±0.09	0.97±0.09	0.9±0.08	0.89±0.08	1	0.000792607	0.00258018	1±0.1	0.98±0.09	0.89±0.08	0.89±0.08	1	0.126675	0.159902	1±0.09	0.99±0.09	0.92±0.08	0.9±0.08	1	0.00219043	0.00791795
[3.27, 3.27]	myo-inositol	1±0.06	1.02±0.05	0.91±0.05	1.03±0.07	1	0.424413	0.99999	1±0.06	1±0.04	0.96±0.05	1±0.05	1	1	1	1±0.06	1.04±0.07	1.05±0.05	1.04±0.06	1	1	1
[3.35, 3.36]	scyllo-inositol	1±0.09	1.01±0.09	0.92±0.09	0.95±0.08	1	0.00387919	0.185908	1±0.09	0.99±0.09	0.92±0.09	0.91±0.08	1	0.611848	0.610834	1±0.09	1.03±0.11	0.97±0.1	0.95±0.12	1	1	1
[3.39, 3.44]	glucose	1±0.04	0.98±0.04	0.93±0.04	0.93±0.04	1	0.000315665	0.00331312	1±0.04	0.98±0.04	0.91±0.03	0.92±0.03	1	0.00560276	0.0669582	1±0.04	1±0.04	0.94±0.04	0.94±0.04	1	0.0960037	0.169926
[3.56, 3.56]	glycine	1±0.05	0.99±0.05	0.93±0.05	0.98±0.04	1	0.00596603	0.99999	1±0.06	1±0.05	0.96±0.05	0.99±0.04	1	1	1	1±0.04	1±0.05	0.97±0.05	0.98±0.05	1	1	1
[4.06, 4.09]	phosphoglyceride	1±0.12	1.01±0.12	0.87±0.1	0.96±0.12	1	0.110747	0.99999	1±0.12	1.04±0.11	1±0.1	0.98±0.13	1	1	1	1±0.16	1.03±0.14	1.03±0.1	0.99±0.12	1	1	1
[4.09, 4.13]	lactate	1±0.05	1.02±0.05	0.92±0.04	1.03±0.05	1	0.335295	0.99999	1±0.06	1.03±0.05	1±0.04	1±0.06	1	1	1	1±0.08	1.03±0.06	1.02±0.03	1±0.06	1	1	1
[4.27, 4.31]	triglycerides	1±0.07	0.97±0.08	0.84±0.06	0.92±0.07	1	0.014403	0.142603	1±0.09	1.02±0.07	0.97±0.06	0.93±0.09	1	1	1	1±0.11	1.01±0.09	1±0.05	0.95±0.07	1	1	1
[5.25, 5.38]	fatty acyl chain -HC=CH- UFA	1±0.12	0.96±0.12	0.9±0.12	0.9±0.11	1	0.00237304	0.00431327	1±0.11	1.04±0.13	0.98±0.13	1.02±0.13	1	1	1	1±0.14	1.02±0.14	0.96±0.13	1±0.14	1	1	1
[6.89, 6.91]	tyrosine	1±0.05	0.95±0.05	0.9±0.05	0.91±0.05	1	0.0417321	0.00471016	1±0.05	1.03±0.04	0.97±0.05	1.04±0.05	1	1	1	1±0.06	1.05±0.06	0.92±0.05	1.04±0.06	1	1	1
[7.06, 7.08]	histidine	1±0.02	0.88±0.04	0.79±0.04	0.82±0.03	1	0.00450097	0.00300632	1±0.04	0.95±0.03	0.89±0.03	0.9±0.03	1	1	0.983365	1±0.03	1.08±0.04	0.93±0.04	0.97±0.03	1	1	1
[7.31, 7.34]	phenylalanine	1±0.04	0.95±0.06	0.89±0.05	0.92±0.05	1	0.0645413	0.380748	1±0.06	0.97±0.06	0.95±0.04	1±0.05	1	1	1	1±0.07	1.11±0.07	0.99±0.06	1.03±0.06	1	1	1
	Repeated measures two-way ANOVA with Sidak post hoc test. Benjamini-Hochberg method was used for p value adjustment to control the FDR across all variables. Absolute integral values were used for the analysis. Values presented in the table were normalised relative to the 0HR group for each type of plasma/serum. HDL, high-density lipoprotein. VLDL, very-low-density lipoprotein. MUFA, monounsaturat…

## Sheet: PQN
Spectral bin (ppm)	Assignment	LH Plasma							Serum							FX Plasma
		mean±SE				adjusted p value			mean±SE				adjusted p value			mean±SE				adjusted p value
		0HR	12HR	24HR	48HR	0HR vs 12HR	0HR vs 24HR	0HR vs 48HR	0HR	12HR	24HR	48HR	0HR vs 12HR	0HR vs 24HR	0HR vs 48HR	0HR	12HR	24HR	48HR	0HR vs 12HR	0HR vs 24HR	0HR vs 48HR
[0.79, 0.87]	fatty acyl chain HDL	1±0.06	0.99±0.04	1.07±0.05	0.99±0.05	1	1	1	1±0.05	0.98±0.04	1±0.05	0.98±0.05	1	1	1	1±0.07	0.95±0.06	0.94±0.04	0.92±0.05	1	1	1
[0.87, 0.93]	fatty acyl chain VLDL	1±0.11	1±0.11	0.99±0.12	0.96±0.11	1	1	1	1±0.11	1.07±0.13	1.05±0.12	1.03±0.11	1	1	1	1±0.11	1.01±0.11	1.05±0.12	1.03±0.1	1	1	1
[0.96, 0.98]	leucine	1±0.04	1.02±0.04	1.02±0.04	1.03±0.03	1	1	1	1±0.03	1.05±0.04	1.04±0.03	1.07±0.03	1	1	0.0675669	1±0.03	1.01±0.03	1.05±0.03	1.05±0.03	1	1	1
[1.01, 1.02]	isoleucine	1±0.03	1.01±0.03	1.03±0.04	1.04±0.03	1	1	1	1±0.03	1.01±0.03	1.02±0.02	1.03±0.03	1	1	0.233288	1±0.03	0.98±0.03	1.04±0.03	1.06±0.03	1	1	1
[1.04, 1.05]	valine	1±0.03	1.01±0.03	1.05±0.03	1.02±0.02	1	0.521424	1	1±0.03	1±0.03	1.01±0.02	1.02±0.03	1	1	1	1±0.03	0.97±0.03	1±0.02	1.02±0.02	1	1	1
[1.18, 1.19]	3-hydroxybutyrate	1±0.14	1.02±0.12	1.29±0.14	0.96±0.1	1	1	1	1±0.1	0.96±0.12	1.07±0.11	0.89±0.1	1	1	1	1±0.06	0.87±0.06	0.97±0.06	0.96±0.06	1	1	1
[1.32, 1.34]	lactate/[fatty acyl chain VLDL]	1±0.12	1±0.12	0.99±0.12	0.96±0.11	1	1	0.808596	1±0.12	1.07±0.14	1.04±0.12	1.05±0.12	1	1	1	1±0.12	1.03±0.13	1.03±0.14	1.01±0.12	1	1	1
[1.47, 1.49]	alanine	1±0.03	0.99±0.03	0.96±0.03	0.99±0.03	1	0.980699	1	1±0.03	1.01±0.03	0.98±0.03	1.01±0.03	1	1	1	1±0.03	1.03±0.03	0.99±0.03	0.99±0.03	1	1	1
[1.54, 1.64]	fatty acyl chain -CH2CH2CO	1±0.14	0.98±0.13	0.91±0.13	0.93±0.14	1	0.0720696	0.0141366	1±0.13	1.07±0.15	1.02±0.14	1.04±0.14	1	1	1	1±0.14	1.05±0.15	1.03±0.15	1.01±0.14	1	1	1
[1.70, 1.76]	arginine/lysine/leucine	1±0.03	0.98±0.03	0.94±0.04	1±0.02	1	1	1	1±0.03	1.01±0.03	0.99±0.04	1.04±0.03	1	1	1	1±0.04	1.05±0.03	1.02±0.04	1.02±0.03	1	1	1
[1.90, 1.91]	lysine	1±0.04	0.98±0.03	0.98±0.04	0.97±0.04	1	1	0.473428	1±0.04	1.01±0.04	0.99±0.03	0.98±0.04	1	1	0.594762	1±0.05	1±0.05	0.97±0.05	0.94±0.05	1	1	1
[1.91, 1.92]	acetate	1±0.03	0.98±0.02	1.02±0.03	1±0.03	1	1	1	1±0.03	0.99±0.03	0.99±0.02	1±0.03	1	1	1	1±0.04	0.98±0.04	0.95±0.03	0.98±0.03	1	1	1
[1.96, 2.03]	proline/fatty acyl chain -CH2CH= MUFA	1±0.05	0.98±0.05	1±0.06	0.94±0.05	1	1	0.445368	1±0.05	1.02±0.06	1±0.06	0.97±0.04	1	1	1	1±0.05	0.98±0.05	0.98±0.06	0.96±0.04	1	1	1
[2.03, 2.05]	GlycA/[fatty acyl chain -CH2CH= MUFA]	1±0.05	1±0.05	1±0.06	0.97±0.05	1	1	1	1±0.05	1.04±0.06	1.03±0.05	1.02±0.05	1	1	1	1±0.05	1.01±0.05	1.02±0.06	1.01±0.05	1	1	1
[2.05, 2.10]	fatty acyl chain -CH2CH= MUFA	1±0.08	1.01±0.08	0.98±0.08	1.02±0.08	1	1	1	1±0.07	1.07±0.09	1.05±0.08	1.09±0.08	1	1	0.421891	1±0.08	1.05±0.09	1.07±0.09	1.06±0.07	1	1	1
[2.23, 2.24]	acetoacetate/Fatty acyl chain -CH2CO	1±0.16	0.98±0.15	0.97±0.16	0.91±0.15	1	0.048728	0.161047	1±0.16	1.07±0.19	1.04±0.18	1.01±0.15	1	1	1	1±0.15	1±0.15	1.01±0.16	0.99±0.14	1	1	1
[2.24, 2.27]	fatty acyl chain -CH2CO	1±0.19	0.98±0.19	0.93±0.19	0.88±0.18	1	0.0132671	0.00397762	1±0.19	1.09±0.22	1.04±0.21	1.03±0.2	1	1	1	1±0.19	1.02±0.2	1.01±0.2	0.97±0.18	1	1	1
[2.34, 2.36]	glutamate	1±0.03	1.09±0.04	1.07±0.04	1.25±0.03	1	1	0.00397762	1±0.02	1.04±0.03	1.05±0.03	1.13±0.04	1	1	0.0675669	1±0.06	1.2±0.03	1.21±0.03	1.29±0.04	1	1	1
[2.43, 2.47]	glutamine	1±0.03	0.97±0.03	0.92±0.03	0.94±0.03	1	0.048728	0.445368	1±0.03	0.99±0.03	0.97±0.03	1±0.03	1	1	0.233288	1±0.04	0.97±0.03	0.94±0.04	0.89±0.04	1	1	1
[2.52, 2.55]	citrate	1±0.04	0.99±0.04	0.94±0.06	1.02±0.04	1	1	1	1±0.04	0.99±0.04	0.97±0.05	1.01±0.04	1	1	1	1±0.06	1.03±0.04	1±0.05	1±0.05	1	1	1
[2.73, 2.85]	fatty acyl chain =CHCH2CH= PUFA	1±0.07	1±0.07	0.98±0.07	0.99±0.07	1	1	1	1±0.06	1.05±0.08	1.04±0.07	1.04±0.07	1	1	1	1±0.07	1.02±0.07	1.01±0.07	0.96±0.06	1	1	1
[2.89, 2.97]	albumin (lysyl moiety)	1±0.04	0.99±0.04	1±0.04	0.99±0.03	1	1	1	1±0.03	0.99±0.04	0.99±0.04	0.97±0.03	1	1	0.256914	1±0.04	0.99±0.04	0.98±0.03	0.94±0.03	1	1	1
[3.03, 3.04]	creatine	1±0.03	1±0.03	1.01±0.03	1.03±0.03	1	1	0.969219	1±0.03	1.01±0.03	1.01±0.04	1.02±0.04	1	1	1	1±0.03	0.99±0.03	1±0.03	0.99±0.04	1	1	1
[3.04, 3.05]	creatinine	1±0.04	1.01±0.03	1.01±0.04	1±0.03	1	1	1	1±0.03	0.99±0.03	0.98±0.03	0.98±0.04	1	1	1	1±0.04	1.01±0.04	1±0.04	0.99±0.04	1	1	1
[3.05, 3.06]	phCreatine	1±0.03	1.01±0.03	1±0.03	1.05±0.02	1	1	0.0791742	1±0.02	1.01±0.03	1.01±0.03	1.01±0.03	1	1	1	1±0.04	1±0.02	1.04±0.03	1.01±0.04	1	1	1
[3.19, 3.20]	choline	1±0.07	0.99±0.05	1.08±0.07	1±0.07	1	1	1	1±0.05	0.97±0.06	0.98±0.07	0.92±0.06	1	1	1	1±0.08	0.94±0.07	0.94±0.05	0.9±0.06	1	1	1
[3.20, 3.23]	phosphocholine	1±0.06	0.97±0.05	1.01±0.06	0.96±0.05	1	1	1	1±0.06	0.96±0.05	0.96±0.06	0.94±0.05	1	1	0.998555	1±0.07	0.95±0.06	0.93±0.05	0.92±0.06	1	1	1
[3.23, 3.23]	glycerophosphocholine	1±0.11	0.99±0.1	0.98±0.1	0.94±0.09	1	1	0.398041	1±0.1	0.99±0.1	0.96±0.1	0.96±0.1	1	1	0.594762	1±0.11	0.97±0.1	0.94±0.09	0.93±0.1	1	1	1
[3.27, 3.27]	myo-inositol	1±0.06	1.03±0.04	0.99±0.05	1.09±0.06	1	1	0.228176	1±0.05	1.02±0.04	1.02±0.05	1.06±0.05	1	1	1	1±0.05	1.03±0.06	1.1±0.05	1.08±0.06	1	1	1
[3.35, 3.36]	scyllo-inositol	1±0.08	1.03±0.08	1±0.08	1.01±0.08	1	1	1	1±0.08	1.01±0.08	0.98±0.09	0.96±0.08	1	1	1	1±0.1	1.02±0.1	1±0.1	0.97±0.1	1	1	1
[3.39, 3.44]	glucose	1±0.05	1±0.05	1.01±0.04	0.99±0.04	1	1	1	1±0.05	0.99±0.05	0.97±0.04	0.97±0.04	1	1	1	1±0.04	0.99±0.05	0.98±0.04	0.97±0.04	1	1	1
[3.56, 3.56]	glycine	1±0.06	1.01±0.05	1.02±0.06	1.04±0.05	1	1	0.0352616	1±0.05	1.02±0.05	1.03±0.05	1.05±0.06	1	1	1	1±0.06	0.99±0.05	1.01±0.05	1.02±0.06	1	1	1
[4.06, 4.09]	phosphoglyceride	1±0.1	1.03±0.1	0.95±0.09	1.02±0.09	1	1	1	1±0.09	1.07±0.09	1.07±0.07	1.03±0.09	1	1	1	1±0.12	1.03±0.11	1.11±0.08	1.03±0.08	1	1	1
[4.09, 4.13]	lactate	1±0.03	1.03±0.04	1±0.03	1.09±0.03	1	1	0.0352616	1±0.03	1.05±0.04	1.07±0.03	1.06±0.04	1	1	1	1±0.06	1.03±0.04	1.09±0.03	1.04±0.04	1	1	1
[4.27, 4.31]	triglycerides	1±0.04	0.99±0.05	0.91±0.05	0.98±0.04	1	1	1	1±0.07	1.05±0.05	1.04±0.03	0.98±0.05	1	1	1	1±0.07	1±0.06	1.07±0.03	0.99±0.03	1	1	1
[5.25, 5.38]	fatty acyl chain -HC=CH- UFA	1±0.1	0.98±0.1	0.98±0.11	0.95±0.09	1	1	0.969219	1±0.09	1.05±0.12	1.03±0.11	1.05±0.09	1	1	1	1±0.1	1.01±0.1	1.02±0.12	1.03±0.09	1	1	1
[6.89, 6.91]	tyrosine	1±0.04	0.97±0.05	0.98±0.04	0.96±0.04	1	1	0.969219	1±0.05	1.04±0.04	1.02±0.04	1.09±0.05	1	1	1	1±0.06	1.04±0.05	0.97±0.05	1.06±0.04	1	1	1
[7.06, 7.08]	histidine	1±0.03	0.89±0.05	0.86±0.05	0.86±0.03	1	0.201776	0.0141366	1±0.04	0.96±0.05	0.95±0.05	0.95±0.05	1	1	1	1±0.04	1.07±0.04	0.98±0.05	1±0.04	1	1	1
[7.31, 7.34]	phenylalanine	1±0.04	0.96±0.07	0.97±0.04	0.98±0.04	1	1	1	1±0.05	0.99±0.05	1.01±0.04	1.07±0.06	1	1	1	1±0.07	1.1±0.06	1.03±0.05	1.06±0.05	1	1	1
	Repeated measures two-way ANOVA with Sidak post hoc test. Benjamini-Hochberg method was used for p value adjustment to control the FDR across all variables. Probabilistic quotient normalised (PQN) integral values were used for the analysis. Values presented in the table were normalised relative to the 0HR group for each type of plasma/serum. HDL, high-density lipoprotein. VLDL, very-low-density l…

## Sheet: sum normalised
Spectral bin (ppm)	Assignment	LH Plasma							Serum							FX Plasma
		mean±SE				adjusted p value			mean±SE				adjusted p value			mean±SE				adjusted p value
		0HR	12HR	24HR	48HR	0HR vs 12HR	0HR vs 24HR	0HR vs 48HR	0HR	12HR	24HR	48HR	0HR vs 12HR	0HR vs 24HR	0HR vs 48HR	0HR	12HR	24HR	48HR	0HR vs 12HR	0HR vs 24HR	0HR vs 48HR
[0.79, 0.87]	fatty acyl chain HDL	1±0.08	1±0.07	1.07±0.07	1.02±0.08	1	0.990938	1	1±0.07	0.96±0.07	0.99±0.07	0.97±0.07	1	1	1	1±0.08	0.96±0.08	0.94±0.06	0.93±0.07	1	1	1
[0.87, 0.93]	fatty acyl chain VLDL	1±0.06	1.01±0.06	0.99±0.07	0.98±0.06	1	1	1	1±0.06	1.03±0.07	1.03±0.07	1.02±0.07	1	1	1	1±0.07	1±0.07	1.04±0.06	1.05±0.06	1	1	0.0676246
[0.96, 0.98]	leucine	1±0.03	1.03±0.03	1.03±0.03	1.06±0.03	1	1	0.0817135	1±0.03	1.02±0.04	1.03±0.03	1.06±0.04	1	0.472937	0.0535359	1±0.03	1.01±0.02	1.05±0.03	1.06±0.03	1	1	0.104588
[1.01, 1.02]	isoleucine	1±0.04	1.02±0.04	1.04±0.04	1.08±0.05	1	0.990938	0.0381075	1±0.04	0.99±0.05	1.01±0.04	1.02±0.05	1	1	1	1±0.04	0.98±0.03	1.04±0.04	1.07±0.03	1	1	0.0676246
[1.04, 1.05]	valine	1±0.04	1.02±0.04	1.05±0.04	1.05±0.05	1	0.0447357	0.0948084	1±0.04	0.98±0.04	1±0.04	1.02±0.05	1	1	1	1±0.04	0.97±0.04	1.01±0.04	1.03±0.04	1	1	0.439731
[1.18, 1.19]	3-hydroxybutyrate	1±0.14	1.02±0.12	1.28±0.12	1.01±0.12	1	0.990938	1	1±0.08	0.94±0.11	1.06±0.09	0.91±0.11	1	1	1	1±0.07	0.88±0.07	0.97±0.07	0.97±0.07	1	1	1
[1.32, 1.34]	lactate/[fatty acyl chain VLDL]	1±0.07	1.01±0.07	0.99±0.07	0.99±0.07	1	1	1	1±0.07	1.03±0.08	1.02±0.08	1.04±0.08	1	1	1	1±0.08	1.03±0.08	1.02±0.08	1.02±0.08	1	1	1
[1.47, 1.49]	alanine	1±0.05	1±0.05	0.97±0.06	1.02±0.05	1	1	1	1±0.05	0.99±0.05	0.97±0.05	1±0.05	1	1	1	1±0.05	1.03±0.05	0.99±0.05	1±0.05	1	1	1
[1.54, 1.64]	fatty acyl chain -CH2CH2CO	1±0.09	0.98±0.09	0.91±0.08	0.95±0.09	1	0.259974	0.588427	1±0.08	1.02±0.09	1±0.09	1.02±0.09	1	1	1	1±0.1	1.04±0.1	1.02±0.09	1.03±0.1	1	1	1
[1.70, 1.76]	arginine/lysine/leucine	1±0.06	0.99±0.06	0.96±0.07	1.03±0.06	1	1	1	1±0.06	0.99±0.07	0.99±0.07	1.02±0.05	1	1	1	1±0.06	1.05±0.06	1.02±0.07	1.04±0.06	1	1	1
[1.90, 1.91]	lysine	1±0.06	0.99±0.06	1±0.07	0.99±0.06	1	1	1	1±0.06	1±0.07	0.99±0.06	0.97±0.06	1	1	1	1±0.07	1±0.07	0.97±0.07	0.95±0.07	1	1	0.439731
[1.91, 1.92]	acetate	1±0.06	0.99±0.05	1.03±0.07	1.03±0.06	1	1	0.993809	1±0.05	0.97±0.06	0.98±0.05	0.99±0.06	1	1	1	1±0.06	0.99±0.06	0.96±0.06	0.99±0.05	1	1	1
[1.96, 2.03]	proline/fatty acyl chain -CH2CH= MUFA	1±0.01	0.99±0.02	1±0.02	0.96±0.01	1	1	0.0948084	1±0.01	0.99±0.02	0.98±0.02	0.96±0.02	1	1	1	1±0.02	0.98±0.01	0.98±0.02	0.97±0.02	1	1	1
[2.03, 2.05]	GlycA/[fatty acyl chain -CH2CH= MUFA]	1±0.02	1.01±0.02	1.01±0.02	1±0.02	1	0.990938	1	1±0.02	1.01±0.02	1.01±0.02	1.01±0.02	1	1	1	1±0.02	1.01±0.02	1.02±0.02	1.02±0.02	0.983472	0.684031	0.0682548
[2.05, 2.10]	fatty acyl chain -CH2CH= MUFA	1±0.04	1.02±0.04	0.99±0.03	1.05±0.04	1	1	0.290685	1±0.03	1.03±0.03	1.04±0.03	1.07±0.04	1	1	1	1±0.05	1.05±0.04	1.07±0.03	1.07±0.04	1	1	0.481782
[2.23, 2.24]	acetoacetate/Fatty acyl chain -CH2CO	1±0.12	0.99±0.11	0.97±0.12	0.93±0.11	1	0.134022	0.0381075	1±0.11	1.03±0.12	1.02±0.12	1±0.11	1	1	1	1±0.11	1±0.1	1±0.11	1±0.11	1	1	1
[2.24, 2.27]	fatty acyl chain -CH2CO	1±0.14	0.98±0.14	0.92±0.14	0.9±0.14	1	0.0056167	0.00478549	1±0.14	1.03±0.15	1.01±0.15	1.01±0.15	1	1	1	1±0.14	1.01±0.14	0.99±0.14	0.99±0.14	1	1	1
[2.34, 2.36]	glutamate	1±0.05	1.1±0.06	1.1±0.07	1.29±0.06	1	1	0.00405201	1±0.04	1.02±0.06	1.05±0.06	1.11±0.05	1	1	1	1±0.06	1.21±0.05	1.22±0.07	1.31±0.06	1	1	0.0676246
[2.43, 2.47]	glutamine	1±0.06	0.98±0.06	0.93±0.06	0.96±0.05	1	0.259974	1	1±0.05	0.98±0.06	0.97±0.06	0.99±0.06	1	1	1	1±0.06	0.97±0.05	0.94±0.06	0.91±0.06	1	1	0.439731
[2.52, 2.55]	citrate	1±0.07	1±0.07	0.96±0.08	1.04±0.07	1	1	1	1±0.06	0.98±0.07	0.97±0.08	1±0.06	1	1	1	1±0.08	1.03±0.07	1.01±0.08	1.01±0.07	1	1	1
[2.73, 2.85]	fatty acyl chain =CHCH2CH= PUFA	1±0.03	1.01±0.04	0.98±0.03	1.02±0.03	1	1	0.993809	1±0.03	1.02±0.03	1.02±0.03	1.02±0.04	1	1	1	1±0.04	1.02±0.03	1.01±0.03	0.97±0.03	1	1	1
[2.89, 2.97]	albumin (lysyl moiety)	1±0.06	1±0.07	1.01±0.07	1.02±0.06	1	1	0.993809	1±0.06	0.98±0.07	0.98±0.07	0.96±0.06	1	1	1	1±0.06	0.99±0.06	0.99±0.06	0.95±0.06	1	1	0.30385
[3.03, 3.04]	creatine	1±0.06	1.01±0.06	1.02±0.06	1.06±0.06	1	1	0.00167738	1±0.06	1±0.06	1±0.06	1±0.06	1	1	1	1±0.06	0.99±0.06	1.01±0.06	1±0.06	1	1	1
[3.04, 3.05]	creatinine	1±0.07	1.02±0.07	1.02±0.07	1.03±0.06	1	1	0.100237	1±0.06	0.98±0.07	0.97±0.06	0.97±0.06	1	1	1	1±0.07	1.01±0.06	1.01±0.07	1±0.07	1	1	1
[3.05, 3.06]	phCreatine	1±0.06	1.02±0.06	1.01±0.06	1.08±0.06	1	1	0.00578572	1±0.05	1±0.06	1±0.06	1±0.05	1	1	1	1±0.06	1±0.05	1.05±0.07	1.03±0.06	1	1	1
[3.19, 3.20]	choline	1±0.09	0.99±0.08	1.09±0.1	1.03±0.09	1	1	1	1±0.07	0.95±0.08	0.97±0.09	0.91±0.07	1	1	1	1±0.09	0.95±0.09	0.94±0.07	0.91±0.08	1	1	1
[3.20, 3.23]	phosphocholine	1±0.09	0.98±0.08	1.02±0.08	0.98±0.08	1	1	1	1±0.07	0.95±0.08	0.95±0.08	0.93±0.07	1	1	1	1±0.08	0.96±0.08	0.94±0.07	0.93±0.08	1	1	0.439731
[3.23, 3.23]	glycerophosphocholine	1±0.12	1±0.12	0.99±0.12	0.97±0.12	1	1	0.381553	1±0.12	0.98±0.12	0.95±0.12	0.95±0.12	1	0.0520852	0.0169647	1±0.12	0.98±0.12	0.96±0.11	0.95±0.11	1	1	0.30385
[3.27, 3.27]	myo-inositol	1±0.07	1.04±0.07	1.01±0.07	1.13±0.09	1	1	0.0992287	1±0.07	1±0.07	1.02±0.07	1.05±0.07	1	1	1	1±0.06	1.03±0.07	1.1±0.07	1.1±0.08	1	1	1
[3.35, 3.36]	scyllo-inositol	1±0.09	1.03±0.1	1.01±0.1	1.04±0.1	1	1	0.0948084	1±0.09	1±0.1	0.97±0.1	0.95±0.09	1	1	1	1±0.11	1.02±0.11	1.01±0.11	0.98±0.11	1	1	1
[3.39, 3.44]	glucose	1±0.07	1.01±0.07	1.02±0.07	1.02±0.07	1	0.820266	0.564854	1±0.06	0.97±0.07	0.97±0.07	0.97±0.07	1	1	1	1±0.07	0.99±0.07	0.98±0.07	0.99±0.07	1	1	1
[3.56, 3.56]	glycine	1±0.08	1.02±0.08	1.03±0.08	1.07±0.08	1	1	0.00578572	1±0.07	1±0.08	1.02±0.08	1.04±0.08	1	1	1	1±0.07	1±0.08	1.02±0.08	1.03±0.08	1	1	0.439731
[4.06, 4.09]	phosphoglyceride	1±0.06	1.04±0.06	0.95±0.06	1.05±0.06	1	1	1	1±0.06	1.04±0.04	1.06±0.03	1.02±0.05	1	1	1	1±0.09	1.03±0.07	1.11±0.03	1.05±0.05	1	1	1
[4.09, 4.13]	lactate	1±0.04	1.04±0.05	1.02±0.05	1.12±0.04	1	1	0.0817135	1±0.03	1.03±0.05	1.06±0.05	1.05±0.04	1	1	1	1±0.07	1.03±0.05	1.1±0.05	1.06±0.06	1	1	1
[4.27, 4.31]	triglycerides	1±0.02	0.99±0.03	0.92±0.04	1.01±0.02	1	1	1	1±0.05	1.03±0.02	1.04±0.02	0.97±0.02	1	1	1	1±0.06	1.01±0.04	1.08±0.03	1.01±0.03	1	1	1
[5.25, 5.38]	fatty acyl chain -HC=CH- UFA	1±0.05	0.98±0.05	0.98±0.05	0.98±0.05	1	1	1	1±0.04	1.01±0.05	1±0.05	1.04±0.05	1	1	1	1±0.06	1.01±0.05	1±0.06	1.05±0.06	1	1	1
[6.89, 6.91]	tyrosine	1±0.06	0.98±0.06	0.99±0.06	1±0.06	1	1	1	1±0.07	1.02±0.06	1.01±0.06	1.08±0.07	1	1	1	1±0.07	1.05±0.07	0.97±0.06	1.08±0.06	1	1	0.45765
[7.06, 7.08]	histidine	1±0.06	0.91±0.07	0.87±0.07	0.89±0.05	1	0.53139	0.0948084	1±0.07	0.95±0.08	0.94±0.07	0.95±0.07	1	1	1	1±0.06	1.07±0.06	0.98±0.07	1.02±0.06	1	1	1
[7.31, 7.34]	phenylalanine	1±0.06	0.97±0.08	0.98±0.07	1.01±0.07	1	1	1	1±0.07	0.97±0.07	1±0.07	1.06±0.08	1	1	1	1±0.08	1.1±0.08	1.03±0.07	1.08±0.07	1	1	0.45765
	Repeated measures two-way ANOVA with Sidak post hoc test. Benjamini-Hochberg method was used for p value adjustment to control the FDR across all variables. Sum-normalised integral values were used for the analysis. Values presented in the table were normalised relative to the 0HR group for each type of plasma/serum. HDL, high-density lipoprotein. VLDL, very-low-density lipoprotein. MUFA, monouns…
