# Supplementary material for: Sodium fluoride preserves blood metabolite integrity for biomarker discovery in large-scale, multi-site metabolomics investigations
Source: Royal Society of Chemistry journal article supplement (doi:10.1039/d3an01359f), 2024-01-01
Supplement: d3an01359f5.xlsx [file d3an01359f5.xlsx]

## Sheet: abs
Spectral bin (ppm)	Assignment	Mean±SE			p.adj
		LH Plasma	Serum	FX Plasma	LH Plasma vs Serum	LH Plasma vs FX Plasma	FX Plasma vs Serum
[0.79, 0.87]	fatty acyl chain HDL	1±0.04	1.02±0.04	0.89±0.05	0.98674	0.0222818	0.0481825
[0.87, 0.93]	fatty acyl chain VLDL	1±0.14	0.99±0.14	0.89±0.13	0.98674	0.000811061	0.226011
[0.96, 0.98]	leucine	1±0.06	1.01±0.05	1.03±0.07	0.98674	0.219514	0.771676
[1.01, 1.02]	isoleucine	1±0.05	1.04±0.05	1.1±0.06	0.806103	0.0906796	0.48955
[1.04, 1.05]	valine	1±0.05	1.02±0.05	1.14±0.04	0.817804	0.000988464	0.0191079
[1.18, 1.19]	3-hydroxybutyrate	1±0.14	0.77±0.08	1.47±0.07	0.588959	0.0847578	0.00362971
[1.32, 1.34]	lactate/[fatty acyl chain VLDL]	1±0.14	1±0.14	0.76±0.13	0.98674	5.45245e-05	0.012968
[1.47, 1.49]	alanine	1±0.04	1.04±0.03	0.72±0.03	0.510476	2.53153e-05	7.4184e-05
[1.54, 1.64]	fatty acyl chain -CH2CH2CO	1±0.16	0.99±0.15	0.77±0.15	0.98674	0.00540251	0.0342335
[1.70, 1.76]	arginine/lysine/leucine	1±0.02	1.03±0.04	0.77±0.04	0.817804	0.000988464	0.00165572
[1.90, 1.91]	lysine	1±0.04	1±0.04	0.77±0.04	0.98674	2.2915e-05	0.000398158
[1.91, 1.92]	acetate	1±0.02	1.01±0.03	0.81±0.03	0.98674	2.2915e-05	0.000328059
[1.96, 2.03]	proline/fatty acyl chain -CH2CH= MUFA	1±0.08	1±0.08	0.82±0.07	0.98674	4.33908e-05	0.00703651
[2.03, 2.05]	GlycA/[fatty acyl chain -CH2CH= MUFA]	1±0.08	1.02±0.07	0.81±0.07	0.98674	4.33908e-05	0.00493682
[2.05, 2.10]	fatty acyl chain -CH2CH= MUFA	1±0.11	1.02±0.1	0.82±0.11	0.98674	0.000988464	0.0191079
[2.23, 2.24]	acetoacetate/Fatty acyl chain -CH2CO	1±0.18	0.92±0.17	0.79±0.15	0.859926	0.0065097	0.250694
[2.24, 2.27]	fatty acyl chain -CH2CO	1±0.21	0.98±0.21	0.85±0.2	0.98674	0.0195	0.28325
[2.34, 2.36]	glutamate	1±0.04	1.12±0.03	0.73±0.06	0.17145	0.0065097	0.00292647
[2.43, 2.47]	glutamine	1±0.02	1.09±0.04	0.77±0.03	0.162859	0.000516658	0.000398158
[2.52, 2.55]	citrate	1±0.02	1.08±0.05	0.75±0.04	0.379206	0.0038636	0.00493682
[2.73, 2.85]	fatty acyl chain =CHCH2CH= PUFA	1±0.09	1.02±0.09	0.82±0.09	0.98674	0.00187956	0.0246232
[2.89, 2.97]	albumin (lysyl moiety)	1±0.01	1±0.01	0.81±0.02	0.98674	5.51805e-05	0.000583834
[3.03, 3.04]	creatine	1±0.03	1.03±0.03	0.8±0.03	0.817804	2.2915e-05	0.000583834
[3.04, 3.05]	creatinine	1±0.02	1.06±0.02	0.82±0.02	0.162859	4.29219e-05	0.000328059
[3.05, 3.06]	phCreatine	1±0.01	1.04±0.03	0.78±0.03	0.510476	0.00011369	0.000943945
[3.19, 3.20]	choline	1±0.05	1±0.04	0.84±0.05	0.98674	0.0201068	0.0473187
[3.20, 3.23]	phosphocholine	1±0.05	1.03±0.05	0.82±0.04	0.696477	7.42808e-05	0.000370597
[3.23, 3.23]	glycerophosphocholine	1±0.09	1.05±0.11	0.82±0.07	0.379206	0.000177325	0.000583834
[3.27, 3.27]	myo-inositol	1±0.06	1.11±0.07	0.81±0.05	0.17145	0.00793098	0.00995969
[3.35, 3.36]	scyllo-inositol	1±0.09	1±0.09	0.81±0.07	0.98674	0.000988464	0.0135805
[3.39, 3.44]	glucose	1±0.04	1.04±0.04	0.95±0.04	0.162859	0.000646317	0.00147515
[3.56, 3.56]	glycine	1±0.05	1.07±0.06	0.83±0.04	0.162859	0.00011369	0.000349876
[4.06, 4.09]	phosphoglyceride	1±0.12	1.08±0.13	0.85±0.14	0.817804	0.219514	0.250694
[4.09, 4.13]	lactate	1±0.05	1.06±0.06	0.82±0.07	0.696477	0.0144189	0.0235562
[4.27, 4.31]	triglycerides	1±0.07	0.95±0.09	0.86±0.09	0.841193	0.193455	0.477434
[5.25, 5.38]	fatty acyl chain -HC=CH- UFA	1±0.12	0.98±0.11	0.8±0.11	0.98674	0.000421526	0.0295261
[6.89, 6.91]	tyrosine	1±0.05	0.98±0.05	0.88±0.05	0.98674	0.0164295	0.109399
[7.06, 7.08]	histidine	1±0.02	0.96±0.04	0.83±0.03	0.817804	0.00793098	0.0141295
[7.31, 7.34]	phenylalanine	1±0.04	1.1±0.07	0.92±0.06	0.510476	0.159659	0.00374473
	Repeated measures two-way ANOVA with Sidak post hoc test. Benjamini-Hochberg method was used for p value adjustment to control the FDR across all variables. Sum-normalised integral values were used for the analysis. Values presented in the table were normalised relative to the LH Plasma group for each type of plasma/serum. HDL, high-density lipoprotein. VLDL, very-low-density lipoprotein. MUFA, m…

## Sheet: PQN
Spectral bin (ppm)	Assignment	Mean±SE			p.adj
		LH Plasma	Serum	FX Plasma	LH Plasma vs Serum	LH Plasma vs FX Plasma	FX Plasma vs Serum
[0.79, 0.87]	fatty acyl chain HDL	1±0.06	0.98±0.05	1.06±0.08	1	1	1
[0.87, 0.93]	fatty acyl chain VLDL	1±0.11	0.96±0.11	1.03±0.11	1	1	1
[0.96, 0.98]	leucine	1±0.04	0.98±0.03	1.21±0.04	1	0.000922389	0.00235645
[1.01, 1.02]	isoleucine	1±0.03	1±0.03	1.29±0.04	1	0.0023461	0.00290126
[1.04, 1.05]	valine	1±0.03	0.99±0.03	1.35±0.04	1	0.000708051	9.21108e-05
[1.18, 1.19]	3-hydroxybutyrate	1±0.14	0.74±0.07	1.74±0.1	1	0.165248	0.00464721
[1.32, 1.34]	lactate/[fatty acyl chain VLDL]	1±0.12	0.97±0.11	0.88±0.1	1	0.0423408	1
[1.47, 1.49]	alanine	1±0.03	1.01±0.03	0.85±0.03	1	0.00111368	7.98801e-05
[1.54, 1.64]	fatty acyl chain -CH2CH2CO	1±0.14	0.96±0.12	0.88±0.13	1	0.0452052	1
[1.70, 1.76]	arginine/lysine/leucine	1±0.03	0.99±0.03	0.9±0.03	1	0.10525	0.13314
[1.90, 1.91]	lysine	1±0.04	0.96±0.03	0.91±0.05	1	0.083889	1
[1.91, 1.92]	acetate	1±0.03	0.97±0.03	0.96±0.04	1	1	1
[1.96, 2.03]	proline/fatty acyl chain -CH2CH= MUFA	1±0.05	0.97±0.05	0.97±0.05	1	1	1
[2.03, 2.05]	GlycA/[fatty acyl chain -CH2CH= MUFA]	1±0.05	0.98±0.05	0.95±0.05	1	0.569246	1
[2.05, 2.10]	fatty acyl chain -CH2CH= MUFA	1±0.08	0.99±0.07	0.95±0.08	1	0.742571	1
[2.23, 2.24]	acetoacetate/Fatty acyl chain -CH2CO	1±0.16	0.89±0.14	0.91±0.14	1	1	1
[2.24, 2.27]	fatty acyl chain -CH2CO	1±0.19	0.95±0.18	0.98±0.18	1	1	1
[2.34, 2.36]	glutamate	1±0.03	1.07±0.02	0.85±0.05	1	0.391831	0.0959299
[2.43, 2.47]	glutamine	1±0.03	1.05±0.03	0.91±0.03	1	0.0785788	0.00235645
[2.52, 2.55]	citrate	1±0.04	1.03±0.04	0.87±0.05	1	0.315978	0.348179
[2.73, 2.85]	fatty acyl chain =CHCH2CH= PUFA	1±0.07	0.99±0.06	0.96±0.07	1	0.735737	1
[2.89, 2.97]	albumin (lysyl moiety)	1±0.04	0.97±0.03	0.96±0.04	1	0.279185	1
[3.03, 3.04]	creatine	1±0.03	0.99±0.03	0.95±0.03	1	0.0512872	1
[3.04, 3.05]	creatinine	1±0.04	1.02±0.03	0.96±0.04	1	0.148274	0.13314
[3.05, 3.06]	phCreatine	1±0.03	1±0.02	0.92±0.03	1	0.083889	0.13314
[3.19, 3.20]	choline	1±0.07	0.96±0.05	1±0.08	1	1	1
[3.20, 3.23]	phosphocholine	1±0.06	0.99±0.05	0.98±0.07	1	1	1
[3.23, 3.23]	glycerophosphocholine	1±0.11	1±0.1	0.97±0.11	1	1	1
[3.27, 3.27]	myo-inositol	1±0.06	1.06±0.05	0.95±0.05	1	1	1
[3.35, 3.36]	scyllo-inositol	1±0.08	0.96±0.08	0.97±0.1	1	1	1
[3.39, 3.44]	glucose	1±0.05	1.01±0.05	1.11±0.05	1	0.0423408	0.0182398
[3.56, 3.56]	glycine	1±0.06	1.02±0.05	0.98±0.06	1	1	0.107772
[4.06, 4.09]	phosphoglyceride	1±0.1	1.04±0.1	0.98±0.12	1	1	1
[4.09, 4.13]	lactate	1±0.03	1.02±0.04	0.95±0.06	1	1	1
[4.27, 4.31]	triglycerides	1±0.04	0.91±0.06	1±0.07	1	1	1
[5.25, 5.38]	fatty acyl chain -HC=CH- UFA	1±0.1	0.95±0.08	0.93±0.09	1	1	1
[6.89, 6.91]	tyrosine	1±0.04	0.95±0.05	1.04±0.06	1	1	1
[7.06, 7.08]	histidine	1±0.03	0.92±0.04	0.98±0.04	1	1	1
[7.31, 7.34]	phenylalanine	1±0.04	1.05±0.05	1.09±0.08	1	1	1
	Repeated measures two-way ANOVA with Sidak post hoc test. Benjamini-Hochberg method was used for p value adjustment to control the FDR across all variables. Probabilistic quotient normalised (PQN) integral values were used for the analysis. Values presented in the table were normalised relative to the LH Plasma group for each type of plasma/serum. HDL, high-density lipoprotein. VLDL, very-low-den…

## Sheet: sum norm
Spectral bin (ppm)	Assignment	Mean±SE			p.adj
		LH Plasma	Serum	FX Plasma	LH Plasma vs Serum	LH Plasma vs FX Plasma	FX Plasma vs Serum
[0.79, 0.87]	fatty acyl chain HDL	1±0.08	1±0.07	1.07±0.09	0.917728	0.208492	0.32301
[0.87, 0.93]	fatty acyl chain VLDL	1±0.06	0.99±0.06	1.06±0.07	0.80121	0.00502626	0.06482
[0.96, 0.98]	leucine	1±0.03	1±0.03	1.24±0.04	0.917728	5.64385e-06	1.80531e-05
[1.01, 1.02]	isoleucine	1±0.04	1.03±0.05	1.31±0.05	0.670887	0.000113099	0.000274299
[1.04, 1.05]	valine	1±0.04	1.01±0.04	1.37±0.06	0.917728	5.64385e-06	1.21674e-05
[1.18, 1.19]	3-hydroxybutyrate	1±0.14	0.75±0.06	1.79±0.12	0.670887	0.0165884	0.00171467
[1.32, 1.34]	lactate/[fatty acyl chain VLDL]	1±0.07	0.99±0.07	0.9±0.07	0.917728	0.000817667	0.0611481
[1.47, 1.49]	alanine	1±0.05	1.03±0.05	0.87±0.04	0.670887	0.000223579	0.00270615
[1.54, 1.64]	fatty acyl chain -CH2CH2CO	1±0.09	1±0.08	0.9±0.09	0.917728	0.0708828	0.178009
[1.70, 1.76]	arginine/lysine/leucine	1±0.06	1.01±0.06	0.92±0.05	0.77075	0.244909	0.270688
[1.90, 1.91]	lysine	1±0.06	0.98±0.06	0.93±0.07	0.670887	0.0154681	0.20386
[1.91, 1.92]	acetate	1±0.06	0.99±0.05	0.97±0.06	0.717417	0.144598	0.74048
[1.96, 2.03]	proline/fatty acyl chain -CH2CH= MUFA	1±0.01	0.99±0.01	0.99±0.02	0.717417	0.675131	0.828893
[2.03, 2.05]	GlycA/[fatty acyl chain -CH2CH= MUFA]	1±0.02	1.01±0.02	0.97±0.02	0.717417	0.00122017	0.00486578
[2.05, 2.10]	fatty acyl chain -CH2CH= MUFA	1±0.04	1.02±0.03	0.97±0.05	0.717417	0.582128	0.491893
[2.23, 2.24]	acetoacetate/Fatty acyl chain -CH2CO	1±0.12	0.92±0.1	0.94±0.11	0.670887	0.272235	0.781629
[2.24, 2.27]	fatty acyl chain -CH2CO	1±0.14	0.98±0.13	1±0.14	0.908696	0.976961	0.82167
[2.34, 2.36]	glutamate	1±0.05	1.1±0.05	0.86±0.06	0.164784	0.10966	0.0266588
[2.43, 2.47]	glutamine	1±0.06	1.07±0.06	0.92±0.05	0.176949	0.0564393	0.0197567
[2.52, 2.55]	citrate	1±0.07	1.05±0.06	0.89±0.07	0.670887	0.156323	0.178009
[2.73, 2.85]	fatty acyl chain =CHCH2CH= PUFA	1±0.03	1.01±0.03	0.98±0.04	0.77075	0.675131	0.653527
[2.89, 2.97]	albumin (lysyl moiety)	1±0.06	0.99±0.06	0.97±0.06	0.908696	0.122013	0.82167
[3.03, 3.04]	creatine	1±0.06	1.01±0.06	0.96±0.05	0.717417	0.0260256	0.0249767
[3.04, 3.05]	creatinine	1±0.07	1.04±0.06	0.98±0.07	0.717417	0.338374	0.374592
[3.05, 3.06]	phCreatine	1±0.06	1.02±0.05	0.94±0.06	0.717417	0.144598	0.178009
[3.19, 3.20]	choline	1±0.09	0.97±0.07	1.01±0.09	0.917728	0.909482	0.82167
[3.20, 3.23]	phosphocholine	1±0.09	1±0.07	0.99±0.08	0.943861	0.896055	0.82167
[3.23, 3.23]	glycerophosphocholine	1±0.12	1.02±0.12	0.98±0.12	0.670887	0.242619	0.250298
[3.27, 3.27]	myo-inositol	1±0.07	1.09±0.07	0.97±0.06	0.717417	0.872951	0.508216
[3.35, 3.36]	scyllo-inositol	1±0.1	0.98±0.08	0.99±0.11	0.908696	0.901796	0.828893
[3.39, 3.44]	glucose	1±0.07	1.03±0.06	1.13±0.07	0.717417	5.64385e-06	0.018393
[3.56, 3.56]	glycine	1±0.08	1.05±0.07	1±0.07	0.670887	0.831841	0.270688
[4.06, 4.09]	phosphoglyceride	1±0.06	1.07±0.07	1±0.09	0.717417	0.976961	0.82167
[4.09, 4.13]	lactate	1±0.04	1.03±0.03	0.97±0.07	0.77075	0.872951	0.666622
[4.27, 4.31]	triglycerides	1±0.02	0.93±0.04	1.02±0.06	0.670887	0.909482	0.666622
[5.25, 5.38]	fatty acyl chain -HC=CH- UFA	1±0.05	0.98±0.04	0.95±0.06	0.840752	0.409543	0.798635
[6.89, 6.91]	tyrosine	1±0.06	0.98±0.07	1.06±0.07	0.852018	0.338374	0.295426
[7.06, 7.08]	histidine	1±0.06	0.95±0.06	1±0.07	0.717417	0.976961	0.653527
[7.31, 7.34]	phenylalanine	1±0.06	1.08±0.08	1.11±0.09	0.670887	0.32124	0.82167
	Repeated measures two-way ANOVA with Sidak post hoc test. Benjamini-Hochberg method was used for p value adjustment to control the FDR across all variables. Sum normalised integral values were used for the analysis. Values presented in the table were normalised relative to the LH Plasma group for each type of plasma/serum. HDL, high-density lipoprotein. VLDL, very-low-density lipoprotein. MUFA, m…
