# Supplementary material for: Sodium fluoride preserves blood metabolite integrity for biomarker discovery in large-scale, multi-site metabolomics investigations
Source: Royal Society of Chemistry journal article supplement (doi:10.1039/d3an01359f), 2024-01-01
Supplement: d3an01359f6.xlsx [file d3an01359f6.xlsx]

## Sheet: abs
spectral bin (ppm)	Assignment	LH Plasma					Serum					FX Plasma
		Mean±SE			adjusted p value		Mean±SE			adjusted p value		Mean±SE			adjusted p value
		0.5HR RT	24HR 4C	24HR RT	0.5HR RT vs 24HR 4C	0.5HR RT vs 24HR RT	0.5HR RT	24HR 4C	24HR RT	0.5HR RT vs 24HR 4C	0.5HR RT vs 24HR RT	0.5HR RT	24HR 4C	24HR RT	0.5HR RT vs 24HR 4C	0.5HR RT vs 24HR RT
[0.79, 0.87]	fatty acyl chain HDL	1±0.04	0.95±0.04	0.94±0.03	0.463696	0.649578	1±0.04	0.95±0.04	0.91±0.04	1	1	1±0.05	0.93±0.04	0.92±0.04	0.527192	1
[0.87, 0.93]	fatty acyl chain VLDL	1±0.14	0.93±0.13	0.91±0.13	0.349772	0.0112475	1±0.14	1.04±0.15	0.98±0.17	1	1	1±0.15	0.95±0.15	0.97±0.15	0.150564	1
[0.96, 0.98]	leucine	1±0.06	0.96±0.05	1.04±0.04	0.593742	0.649578	1±0.05	1.04±0.06	1.11±0.08	1	1	1±0.06	0.96±0.06	1.01±0.05	0.527192	1
[1.01, 1.02]	isoleucine	1±0.05	1±0.05	1.08±0.04	1	0.0442242	1±0.05	1.02±0.04	1.09±0.07	1	1	1±0.06	0.96±0.06	1.02±0.05	0.527192	1
[1.04, 1.05]	valine	1±0.05	0.96±0.04	1.01±0.04	0.19142	1	1±0.05	1.01±0.05	1.05±0.07	1	1	1±0.04	0.94±0.04	0.96±0.04	0.0787139	1
[1.18, 1.19]	3-hydroxybutyrate	1±0.14	0.98±0.15	0.95±0.14	1	1	1±0.11	0.97±0.09	1±0.12	1	1	1±0.05	0.9±0.05	0.83±0.05	0.641488	0.223401
[1.32, 1.34]	lactate/[fatty acyl chain VLDL]	1±0.14	1.19±0.12	2.03±0.12	0.00350332	1.83969e-07	1±0.14	1.44±0.15	2.21±0.21	0.00341063	4.17419e-06	1±0.17	0.94±0.15	1.06±0.17	0.463886	0.864012
[1.47, 1.49]	alanine	1±0.04	0.93±0.03	1.01±0.04	0.0640364	1	1±0.03	0.97±0.05	1.05±0.07	1	1	1±0.04	0.96±0.04	1.09±0.05	0.640181	0.0283545
[1.54, 1.64]	fatty acyl chain -CH2CH2CO	1±0.16	0.9±0.14	0.83±0.14	0.098818	0.0260737	1±0.15	1±0.17	0.9±0.19	1	1	1±0.19	0.94±0.17	0.96±0.19	0.640528	1
[1.70, 1.76]	arginine/lysine/leucine	1±0.02	0.92±0.04	0.97±0.03	0.225068	1	1±0.04	0.96±0.03	0.99±0.06	1	1	1±0.05	0.95±0.04	1.03±0.05	0.989031	1
[1.90, 1.91]	lysine	1±0.04	0.89±0.04	0.9±0.04	0.000207887	0.00214759	1±0.04	0.95±0.04	0.98±0.07	1	1	1±0.05	0.91±0.04	0.96±0.05	0.150564	1
[1.91, 1.92]	acetate	1±0.02	0.89±0.03	0.81±0.03	0.000150083	2.29149e-05	1±0.03	0.93±0.03	0.94±0.05	1	1	1±0.04	0.91±0.03	0.96±0.04	0.0788364	1
[1.96, 2.03]	proline/fatty acyl chain -CH2CH= MUFA	1±0.08	0.93±0.07	0.9±0.07	0.0126424	2.80332e-05	1±0.08	0.98±0.09	0.93±0.09	1	1	1±0.08	0.94±0.08	0.95±0.09	0.150564	0.866455
[2.03, 2.05]	GlycA/[fatty acyl chain -CH2CH= MUFA]	1±0.08	0.94±0.07	0.91±0.07	0.0551996	0.00475791	1±0.07	0.99±0.09	0.95±0.1	1	1	1±0.09	0.94±0.08	0.97±0.09	0.0788364	1
[2.05, 2.10]	fatty acyl chain -CH2CH= MUFA	1±0.11	0.92±0.09	0.93±0.09	0.50414	0.369218	1±0.1	1.02±0.11	0.99±0.14	1	1	1±0.13	0.95±0.11	1.04±0.13	0.950925	1
[2.23, 2.24]	acetoacetate/Fatty acyl chain -CH2CO	1±0.18	0.95±0.18	0.9±0.15	0.122274	0.264337	1±0.18	1.06±0.21	1±0.2	1	1	1±0.19	0.96±0.18	0.99±0.18	0.950925	1
[2.24, 2.27]	fatty acyl chain -CH2CO	1±0.21	0.89±0.19	0.75±0.17	0.0413882	0.0195969	1±0.22	1.01±0.24	0.88±0.23	1	1	1±0.24	0.92±0.22	0.88±0.22	0.273097	0.222507
[2.34, 2.36]	glutamate	1±0.04	0.91±0.03	1.11±0.05	0.593742	1	1±0.03	0.98±0.04	1.32±0.1	1	0.267312	1±0.08	1±0.05	1.8±0.05	1	0.000154125
[2.43, 2.47]	glutamine	1±0.02	0.92±0.03	0.92±0.03	0.136512	0.331149	1±0.04	0.92±0.04	0.85±0.05	1	0.447091	1±0.04	0.9±0.04	0.69±0.05	0.166519	0.000190073
[2.52, 2.55]	citrate	1±0.02	0.88±0.03	0.93±0.04	0.0587783	1	1±0.04	0.88±0.04	0.88±0.05	1	1	1±0.05	0.88±0.05	0.96±0.05	0.527192	1
[2.73, 2.85]	fatty acyl chain =CHCH2CH= PUFA	1±0.09	0.91±0.08	0.92±0.08	0.0439912	0.103282	1±0.08	0.97±0.1	0.95±0.12	1	1	1±0.11	0.92±0.09	0.99±0.1	0.601026	1
[2.89, 2.97]	albumin (lysyl moiety)	1±0.01	0.91±0.01	0.92±0.02	0.00412756	0.0662942	1±0.01	0.93±0.02	0.9±0.03	1	1	1±0.02	0.94±0.02	0.96±0.03	0.640528	1
[3.03, 3.04]	creatine	1±0.03	0.95±0.03	0.98±0.03	0.0269054	0.702063	1±0.03	0.98±0.04	0.98±0.05	1	1	1±0.03	0.95±0.03	1.02±0.04	0.527192	1
[3.04, 3.05]	creatinine	1±0.02	0.96±0.01	1.02±0.02	0.251518	1	1±0.02	0.95±0.03	0.98±0.04	1	1	1±0.02	0.95±0.02	1.07±0.03	0.527192	0.263783
[3.05, 3.06]	phCreatine	1±0.01	0.96±0.02	1.1±0.03	0.786563	0.0983996	1±0.03	0.98±0.04	1.1±0.06	1	1	1±0.03	0.96±0.02	1.16±0.03	1	0.0346441
[3.19, 3.20]	choline	1±0.05	0.95±0.05	0.95±0.03	1	1	1±0.04	0.94±0.03	0.98±0.06	1	1	1±0.06	0.95±0.05	1.01±0.05	1	1
[3.20, 3.23]	phosphocholine	1±0.05	0.93±0.04	0.91±0.03	0.0113126	0.0116922	1±0.05	0.93±0.04	0.87±0.04	1	0.447091	1±0.05	0.93±0.04	0.92±0.04	0.150564	0.263783
[3.23, 3.23]	glycerophosphocholine	1±0.09	0.93±0.09	0.88±0.08	0.0026053	0.00039438	1±0.1	0.94±0.1	0.82±0.07	1	0.555633	1±0.09	0.94±0.09	0.9±0.08	0.010968	0.00496635
[3.27, 3.27]	myo-inositol	1±0.06	0.95±0.06	1.01±0.05	1	1	1±0.06	0.94±0.06	0.95±0.07	1	1	1±0.06	0.98±0.04	1.14±0.06	1	0.777308
[3.35, 3.36]	scyllo-inositol	1±0.09	0.93±0.08	0.92±0.09	0.0126424	0.165993	1±0.09	0.9±0.12	0.86±0.1	1	1	1±0.09	0.93±0.09	1±0.09	0.640528	1
[3.39, 3.44]	glucose	1±0.04	0.81±0.04	0.56±0.04	7.10304e-07	1.24918e-08	1±0.04	0.74±0.05	0.55±0.05	0.000464165	3.55052e-06	1±0.04	0.92±0.04	0.93±0.05	0.0194306	0.10185
[3.56, 3.56]	glycine	1±0.05	0.95±0.05	1.01±0.05	0.0427426	1	1±0.06	0.98±0.05	1.08±0.07	1	1	1±0.04	0.94±0.05	1.16±0.04	0.136805	0.00147174
[4.06, 4.09]	phosphoglyceride	1±0.12	0.96±0.11	0.93±0.09	1	1	1±0.12	0.98±0.13	0.95±0.12	1	1	1±0.16	0.92±0.11	1.01±0.11	1	1
[4.09, 4.13]	lactate	1±0.05	1.34±0.04	2.49±0.08	0.000150083	1.13034e-07	1±0.06	1.52±0.07	2.47±0.14	0.00205619	4.17419e-06	1±0.08	0.93±0.05	1.11±0.05	1	1
[4.27, 4.31]	triglycerides	1±0.07	0.9±0.07	0.82±0.05	0.33823	0.0290769	1±0.09	0.93±0.1	0.84±0.09	1	0.447091	1±0.11	0.89±0.07	0.92±0.07	0.989031	1
[5.25, 5.38]	fatty acyl chain -HC=CH- UFA	1±0.12	0.95±0.1	0.91±0.11	0.773564	0.103282	1±0.11	1.06±0.13	0.97±0.14	1	1	1±0.14	0.99±0.14	0.99±0.15	1	1
[6.89, 6.91]	tyrosine	1±0.05	0.91±0.04	0.94±0.05	0.0896086	0.375834	1±0.05	0.99±0.06	1.01±0.07	1	1	1±0.06	0.97±0.05	0.97±0.06	1	1
[7.06, 7.08]	histidine	1±0.02	1.2±0.05	1.36±0.04	0.0465355	0.000554908	1±0.04	1.15±0.04	1.18±0.07	1	0.918165	1±0.03	1.23±0.05	1.3±0.06	0.0636101	0.0461714
[7.31, 7.34]	phenylalanine	1±0.04	0.92±0.05	1.02±0.05	0.251518	1	1±0.06	1.01±0.07	1.04±0.07	1	1	1±0.07	0.99±0.05	1±0.05	1	1
	Repeated measures two-way ANOVA with Sidak post hoc test. Benjamini-Hochberg method was used for p value adjustment to control the FDR across all variables. Absolute integral values were used for the analysis. Values presented in the table were normalised relative to the 0.5HR RT group for each type of plasma/serum. HDL, high-density lipoprotein. VLDL, very-low-density lipoprotein. MUFA, monounsa…

## Sheet: PQN
spectral bin (ppm)	Assignment	LH Plasma					Serum					FX Plasma
		Mean±SE			adjusted p value		Mean±SE			adjusted p value		Mean±SE			adjusted p value
		0.5HR RT	24HR 4C	24HR RT	0.5HR RT vs 24HR 4C	0.5HR RT vs 24HR RT	0.5HR RT	24HR 4C	24HR RT	0.5HR RT vs 24HR 4C	0.5HR RT vs 24HR RT	0.5HR RT	24HR 4C	24HR RT	0.5HR RT vs 24HR 4C	0.5HR RT vs 24HR RT
[0.79, 0.87]	fatty acyl chain HDL	1±0.06	1.01±0.06	0.97±0.04	1	1	1±0.05	0.98±0.04	0.94±0.05	1	1	1±0.07	0.98±0.06	0.91±0.05	1	0.877755
[0.87, 0.93]	fatty acyl chain VLDL	1±0.11	0.99±0.12	0.94±0.11	1	0.642629	1±0.11	1.07±0.13	0.97±0.12	1	1	1±0.11	1.01±0.12	0.97±0.12	1	1
[0.96, 0.98]	leucine	1±0.04	1.01±0.04	1.08±0.03	1	0.153177	1±0.03	1.07±0.03	1.12±0.02	1	0.000738786	1±0.03	1.03±0.04	1.01±0.03	1	1
[1.01, 1.02]	isoleucine	1±0.03	1.06±0.04	1.12±0.03	0.661924	0.0529466	1±0.03	1.06±0.02	1.11±0.03	0.71073	0.028849	1±0.03	1.02±0.04	1.02±0.03	1	1
[1.04, 1.05]	valine	1±0.03	1.02±0.03	1.04±0.02	1	1	1±0.03	1.04±0.02	1.07±0.03	1	0.537373	1±0.03	0.99±0.03	0.96±0.03	1	0.644703
[1.18, 1.19]	3-hydroxybutyrate	1±0.14	1.04±0.15	0.98±0.14	1	1	1±0.1	1±0.08	1.04±0.12	1	1	1±0.06	0.95±0.05	0.83±0.06	1	0.306992
[1.32, 1.34]	lactate/[fatty acyl chain VLDL]	1±0.12	1.28±0.1	2.14±0.09	0.000172328	2.90852e-06	1±0.12	1.5±0.11	2.27±0.09	0.000494651	5.46143e-07	1±0.12	1.01±0.12	1.06±0.12	1	1
[1.47, 1.49]	alanine	1±0.03	0.98±0.03	1.04±0.03	1	0.826259	1±0.03	1±0.03	1.06±0.02	1	0.506736	1±0.03	1.02±0.04	1.08±0.03	1	0.0306157
[1.54, 1.64]	fatty acyl chain -CH2CH2CO	1±0.14	0.95±0.14	0.86±0.12	1	0.0139459	1±0.13	1.03±0.15	0.88±0.14	1	0.381202	1±0.14	1.01±0.14	0.96±0.14	1	1
[1.70, 1.76]	arginine/lysine/leucine	1±0.03	0.96±0.04	1±0.03	1	1	1±0.03	1±0.03	1±0.03	1	1	1±0.04	1.02±0.04	1.02±0.04	1	1
[1.90, 1.91]	lysine	1±0.04	0.94±0.04	0.92±0.04	0.054244	0.0391701	1±0.04	0.99±0.03	1±0.03	1	1	1±0.05	0.97±0.05	0.94±0.04	1	0.192213
[1.91, 1.92]	acetate	1±0.03	0.94±0.03	0.84±0.03	0.17977	0.000893819	1±0.03	0.97±0.02	0.96±0.02	1	1	1±0.04	0.97±0.03	0.95±0.03	1	0.234706
[1.96, 2.03]	proline/fatty acyl chain -CH2CH= MUFA	1±0.05	0.99±0.06	0.92±0.05	1	0.0619119	1±0.05	1.01±0.06	0.93±0.05	1	1	1±0.05	0.99±0.05	0.94±0.05	1	0.851193
[2.03, 2.05]	GlycA/[fatty acyl chain -CH2CH= MUFA]	1±0.05	1±0.06	0.94±0.05	1	0.0910734	1±0.05	1.03±0.06	0.95±0.05	1	1	1±0.05	1±0.05	0.97±0.06	1	1
[2.05, 2.10]	fatty acyl chain -CH2CH= MUFA	1±0.08	0.98±0.08	0.96±0.07	1	1	1±0.07	1.05±0.08	0.98±0.08	1	1	1±0.08	1.02±0.08	1.04±0.08	1	1
[2.23, 2.24]	acetoacetate/Fatty acyl chain -CH2CO	1±0.16	1.01±0.17	0.94±0.14	1	1	1±0.16	1.1±0.19	0.98±0.15	1	1	1±0.15	1.03±0.16	1±0.15	1	1
[2.24, 2.27]	fatty acyl chain -CH2CO	1±0.19	0.94±0.19	0.78±0.16	0.174976	0.0107881	1±0.19	1.04±0.21	0.85±0.18	1	0.72543	1±0.19	0.98±0.19	0.88±0.18	1	0.0569344
[2.34, 2.36]	glutamate	1±0.03	0.96±0.02	1.14±0.05	1	1	1±0.02	1.01±0.02	1.34±0.05	1	0.00282595	1±0.06	1.07±0.03	1.82±0.06	1	0.000100095
[2.43, 2.47]	glutamine	1±0.03	0.97±0.03	0.95±0.03	1	0.537569	1±0.03	0.95±0.03	0.86±0.02	0.263003	0.00832584	1±0.04	0.96±0.04	0.68±0.04	1	0.000100095
[2.52, 2.55]	citrate	1±0.04	0.92±0.04	0.96±0.04	0.52683	1	1±0.04	0.92±0.04	0.89±0.03	0.647684	0.628152	1±0.06	0.94±0.06	0.95±0.05	1	1
[2.73, 2.85]	fatty acyl chain =CHCH2CH= PUFA	1±0.07	0.97±0.07	0.95±0.06	1	0.0310885	1±0.06	1.01±0.08	0.95±0.07	1	1	1±0.07	0.99±0.06	0.99±0.07	1	1
[2.89, 2.97]	albumin (lysyl moiety)	1±0.04	0.96±0.03	0.94±0.03	1	0.406388	1±0.03	0.96±0.03	0.93±0.03	1	0.0546016	1±0.04	1±0.04	0.95±0.03	1	0.694235
[3.03, 3.04]	creatine	1±0.03	1±0.03	1.01±0.03	1	1	1±0.03	1.02±0.03	1±0.03	1	1	1±0.03	1.01±0.04	1.01±0.03	1	1
[3.04, 3.05]	creatinine	1±0.04	1.01±0.03	1.05±0.03	1	0.0159972	1±0.03	0.98±0.03	1.01±0.03	1	1	1±0.04	1.01±0.04	1.06±0.04	1	0.14293
[3.05, 3.06]	phCreatine	1±0.03	1.01±0.03	1.13±0.03	1	0.000569864	1±0.02	1.02±0.03	1.12±0.03	1	0.00731829	1±0.04	1.02±0.04	1.15±0.03	1	0.00834021
[3.19, 3.20]	choline	1±0.07	1.01±0.07	0.98±0.04	1	1	1±0.05	0.97±0.04	1.02±0.07	1	1	1±0.08	1.01±0.06	1±0.06	1	1
[3.20, 3.23]	phosphocholine	1±0.06	0.99±0.06	0.93±0.05	1	0.401347	1±0.06	0.96±0.05	0.91±0.06	1	0.0187226	1±0.07	0.98±0.06	0.91±0.05	1	0.121162
[3.23, 3.23]	glycerophosphocholine	1±0.11	0.98±0.11	0.9±0.09	1	0.0204024	1±0.1	0.96±0.1	0.86±0.08	1	0.00526715	1±0.11	0.99±0.11	0.88±0.09	1	0.0556814
[3.27, 3.27]	myo-inositol	1±0.06	0.99±0.05	1.05±0.04	1	1	1±0.05	0.98±0.04	0.97±0.04	1	1	1±0.05	1.04±0.04	1.13±0.05	1	0.877755
[3.35, 3.36]	scyllo-inositol	1±0.08	0.97±0.07	0.95±0.09	1	0.826259	1±0.08	0.91±0.08	0.88±0.08	0.999438	0.381202	1±0.1	0.98±0.1	0.98±0.09	1	1
[3.39, 3.44]	glucose	1±0.05	0.86±0.05	0.58±0.04	0.000587795	2.41746e-06	1±0.05	0.76±0.04	0.56±0.04	1.47533e-05	1.77513e-07	1±0.04	0.98±0.05	0.92±0.04	1	0.00496755
[3.56, 3.56]	glycine	1±0.06	1.01±0.06	1.04±0.05	1	1	1±0.05	1.02±0.05	1.11±0.06	1	0.00739229	1±0.06	1±0.06	1.15±0.06	1	0.00184914
[4.06, 4.09]	phosphoglyceride	1±0.1	1.02±0.1	0.96±0.06	1	1	1±0.09	1.02±0.11	0.96±0.07	1	1	1±0.12	0.99±0.09	1.02±0.08	1	1
[4.09, 4.13]	lactate	1±0.03	1.42±0.04	2.59±0.1	4.85334e-05	1.63739e-06	1±0.03	1.58±0.04	2.55±0.08	1.47533e-05	8.87731e-07	1±0.06	0.99±0.03	1.11±0.03	1	0.866336
[4.27, 4.31]	triglycerides	1±0.04	0.94±0.05	0.85±0.03	1	0.0231211	1±0.07	0.96±0.07	0.84±0.06	1	0.0593865	1±0.07	0.95±0.03	0.93±0.04	1	1
[5.25, 5.38]	fatty acyl chain -HC=CH- UFA	1±0.1	1.01±0.09	0.95±0.1	1	1	1±0.09	1.09±0.11	0.96±0.09	1	1	1±0.1	1.06±0.11	0.98±0.12	1	1
[6.89, 6.91]	tyrosine	1±0.04	0.96±0.04	0.97±0.04	1	1	1±0.05	1.02±0.04	1.02±0.04	1	1	1±0.06	1.03±0.04	0.96±0.05	1	1
[7.06, 7.08]	histidine	1±0.03	1.27±0.05	1.4±0.04	0.0283657	0.000226052	1±0.04	1.19±0.04	1.21±0.05	0.0250943	0.0180109	1±0.04	1.31±0.07	1.28±0.06	0.148917	0.14293
[7.31, 7.34]	phenylalanine	1±0.04	0.97±0.05	1.05±0.05	1	1	1±0.05	1.05±0.06	1.06±0.05	0.999438	0.571558	1±0.07	1.05±0.05	0.99±0.04	1	1
	Repeated measures two-way ANOVA with Sidak post hoc test. Benjamini-Hochberg method was used for p value adjustment to control the FDR across all variables. Probabilistic quotient normalised (PQN) integral values were used for the analysis. Values presented in the table were normalised relative to the 0.5HR RT group for each type of plasma/serum. HDL, high-density lipoprotein. VLDL, very-low-dens…

## Sheet: sum-normalised
spectral bin (ppm)	Assignment	LH Plasma					Serum					FX Plasma
		Mean±SE			adjusted p value		Mean±SE			adjusted p value		Mean±SE			adjusted p value
		0.5HR RT	24HR 4C	24HR RT	0.5HR RT vs 24HR 4C	0.5HR RT vs 24HR RT	0.5HR RT	24HR 4C	24HR RT	0.5HR RT vs 24HR 4C	0.5HR RT vs 24HR RT	0.5HR RT	24HR 4C	24HR RT	0.5HR RT vs 24HR 4C	0.5HR RT vs 24HR RT
[0.79, 0.87]	fatty acyl chain HDL	1±0.08	0.99±0.07	0.91±0.05	0.98367	0.0928063	1±0.07	0.94±0.06	0.88±0.06	0.070815	0.00644172	1±0.08	0.98±0.07	0.94±0.07	0.831841	0.227623
[0.87, 0.93]	fatty acyl chain VLDL	1±0.06	0.98±0.07	0.89±0.06	0.323843	3.85157e-05	1±0.06	1.01±0.07	0.91±0.07	0.815519	0.00725131	1±0.07	1±0.07	0.99±0.07	0.91437	0.851398
[0.96, 0.98]	leucine	1±0.03	1±0.03	1.03±0.03	0.98367	0.190619	1±0.03	1.02±0.03	1.05±0.03	0.297553	0.0122323	1±0.03	1.02±0.03	1.05±0.03	0.696651	0.145683
[1.01, 1.02]	isoleucine	1±0.04	1.05±0.04	1.06±0.04	0.0210834	0.0411605	1±0.04	1.01±0.04	1.04±0.04	0.571979	0.00131891	1±0.04	1.02±0.04	1.06±0.04	0.831841	0.178291
[1.04, 1.05]	valine	1±0.04	1±0.04	0.98±0.04	0.98367	0.728851	1±0.04	1±0.04	1.01±0.05	0.937275	0.741763	1±0.04	0.99±0.04	0.99±0.05	0.920649	0.928195
[1.18, 1.19]	3-hydroxybutyrate	1±0.14	1.02±0.15	0.94±0.15	0.98367	0.728851	1±0.08	0.95±0.06	1.01±0.13	0.732218	0.962429	1±0.07	0.94±0.04	0.85±0.06	0.797068	0.120048
[1.32, 1.34]	lactate/[fatty acyl chain VLDL]	1±0.07	1.28±0.05	2.09±0.06	1.21464e-05	4.43053e-06	1±0.07	1.45±0.04	2.2±0.05	7.84527e-06	3.11181e-06	1±0.08	1.01±0.07	1.1±0.07	0.831841	0.00320333
[1.47, 1.49]	alanine	1±0.05	0.97±0.05	0.99±0.04	0.323843	0.728851	1±0.05	0.96±0.05	0.99±0.04	0.309403	0.883416	1±0.05	1.02±0.06	1.13±0.06	0.696651	0.000359143
[1.54, 1.64]	fatty acyl chain -CH2CH2CO	1±0.09	0.94±0.09	0.82±0.08	0.0970584	0.00148892	1±0.08	0.97±0.09	0.82±0.1	0.571979	0.0018266	1±0.1	1.01±0.09	0.99±0.09	0.831841	0.846589
[1.70, 1.76]	arginine/lysine/leucine	1±0.06	0.95±0.06	0.95±0.05	0.324873	0.190619	1±0.06	0.96±0.06	0.94±0.04	0.309403	0.22405	1±0.06	1.02±0.07	1.07±0.07	0.831841	0.233776
[1.90, 1.91]	lysine	1±0.06	0.93±0.06	0.88±0.05	0.0174389	0.00481974	1±0.06	0.95±0.06	0.94±0.05	0.0649562	0.0254176	1±0.07	0.97±0.07	0.98±0.07	0.797068	0.747629
[1.91, 1.92]	acetate	1±0.06	0.93±0.06	0.79±0.05	0.0374239	0.000465809	1±0.05	0.93±0.05	0.9±0.04	0.0534627	0.00644172	1±0.06	0.97±0.06	0.99±0.06	0.696651	0.747629
[1.96, 2.03]	proline/fatty acyl chain -CH2CH= MUFA	1±0.01	0.98±0.01	0.88±0.02	0.213291	5.3011e-05	1±0.01	0.96±0.02	0.88±0.02	0.0168222	7.35867e-05	1±0.02	0.99±0.01	0.97±0.02	0.831841	0.183946
[2.03, 2.05]	GlycA/[fatty acyl chain -CH2CH= MUFA]	1±0.02	0.99±0.02	0.9±0.02	0.0217517	7.01995e-06	1±0.02	0.97±0.02	0.89±0.02	0.0168222	7.35867e-05	1±0.02	1±0.02	1±0.02	0.946031	0.851398
[2.05, 2.10]	fatty acyl chain -CH2CH= MUFA	1±0.04	0.97±0.04	0.92±0.03	0.435137	0.0110026	1±0.03	0.99±0.03	0.92±0.04	0.679165	0.00921292	1±0.05	1.02±0.04	1.08±0.04	0.831841	0.120048
[2.23, 2.24]	acetoacetate/Fatty acyl chain -CH2CO	1±0.12	0.99±0.12	0.9±0.1	0.760025	0.0297703	1±0.11	1.02±0.13	0.93±0.11	0.686475	0.338066	1±0.11	1.03±0.12	1.03±0.1	0.199228	0.657397
[2.24, 2.27]	fatty acyl chain -CH2CO	1±0.14	0.93±0.14	0.74±0.11	0.00132092	0.000556453	1±0.14	0.97±0.14	0.79±0.13	0.749669	0.00185237	1±0.14	0.97±0.14	0.9±0.13	0.372027	0.00629039
[2.34, 2.36]	glutamate	1±0.05	0.96±0.05	1.09±0.07	0.435137	0.333451	1±0.04	0.96±0.05	1.25±0.06	0.571979	0.00644172	1±0.06	1.07±0.06	1.91±0.11	0.696651	0.00031123
[2.43, 2.47]	glutamine	1±0.06	0.96±0.06	0.9±0.05	0.223375	0.00481974	1±0.05	0.91±0.06	0.8±0.04	0.0586527	0.00155295	1±0.06	0.96±0.06	0.71±0.05	0.696651	0.00031123
[2.52, 2.55]	citrate	1±0.07	0.92±0.07	0.91±0.06	0.138563	0.0799402	1±0.06	0.88±0.06	0.83±0.04	0.129903	0.0799402	1±0.08	0.94±0.08	1±0.08	0.797068	0.959503
[2.73, 2.85]	fatty acyl chain =CHCH2CH= PUFA	1±0.03	0.95±0.04	0.9±0.03	0.0970584	0.00223227	1±0.03	0.95±0.03	0.89±0.04	0.0937133	0.00386096	1±0.04	0.99±0.03	1.02±0.03	0.884896	0.747629
[2.89, 2.97]	albumin (lysyl moiety)	1±0.06	0.95±0.06	0.89±0.05	0.11333	0.0110026	1±0.06	0.92±0.06	0.87±0.05	0.110642	0.00725131	1±0.06	1±0.07	0.99±0.07	0.924951	0.851398
[3.03, 3.04]	creatine	1±0.06	0.99±0.06	0.95±0.05	0.340115	0.0114737	1±0.06	0.97±0.06	0.94±0.05	0.142287	0.0018266	1±0.06	1.02±0.06	1.05±0.06	0.797068	0.0274855
[3.04, 3.05]	creatinine	1±0.07	1±0.06	0.99±0.06	0.98367	0.728851	1±0.06	0.94±0.06	0.95±0.05	0.374592	0.26584	1±0.07	1.01±0.07	1.1±0.07	0.831841	0.00148634
[3.05, 3.06]	phCreatine	1±0.06	1±0.05	1.07±0.06	0.98367	0.0363623	1±0.05	0.97±0.06	1.05±0.05	0.571979	0.20279	1±0.06	1.03±0.06	1.19±0.07	0.831841	0.00156434
[3.19, 3.20]	choline	1±0.09	0.99±0.09	0.92±0.05	0.98367	0.487353	1±0.07	0.93±0.06	0.96±0.09	0.571979	0.823478	1±0.09	1.01±0.08	1.04±0.09	0.924951	0.851398
[3.20, 3.23]	phosphocholine	1±0.09	0.97±0.08	0.88±0.06	0.392318	0.0142304	1±0.07	0.92±0.07	0.85±0.07	0.0937133	0.000781748	1±0.08	0.98±0.08	0.95±0.08	0.831841	0.0820081
[3.23, 3.23]	glycerophosphocholine	1±0.12	0.97±0.12	0.85±0.1	0.00778874	0.00169886	1±0.12	0.92±0.11	0.8±0.09	0.00467186	0.0018266	1±0.12	1±0.12	0.92±0.11	0.831841	0.00266963
[3.27, 3.27]	myo-inositol	1±0.07	0.99±0.07	0.99±0.06	0.98367	0.943613	1±0.07	0.94±0.07	0.91±0.05	0.667237	0.338066	1±0.06	1.05±0.06	1.18±0.08	0.831841	0.120048
[3.35, 3.36]	scyllo-inositol	1±0.1	0.97±0.09	0.9±0.09	0.138563	0.0142304	1±0.09	0.88±0.1	0.83±0.08	0.110642	0.0210391	1±0.11	0.99±0.11	1.03±0.12	0.91437	0.657397
[3.39, 3.44]	glucose	1±0.07	0.85±0.06	0.55±0.05	3.09783e-05	4.43053e-06	1±0.06	0.73±0.05	0.53±0.04	1.21956e-05	3.11181e-06	1±0.07	0.97±0.06	0.96±0.06	0.0531044	0.00541574
[3.56, 3.56]	glycine	1±0.08	0.99±0.08	0.99±0.07	0.860525	0.728851	1±0.07	0.98±0.07	1.04±0.08	0.733977	0.243125	1±0.07	1.01±0.08	1.2±0.09	0.831841	0.000404612
[4.06, 4.09]	phosphoglyceride	1±0.06	1.01±0.06	0.93±0.03	0.98367	0.487353	1±0.06	0.96±0.06	0.9±0.04	0.796576	0.204397	1±0.09	0.99±0.06	1.07±0.05	0.964829	0.851398
[4.09, 4.13]	lactate	1±0.04	1.42±0.06	2.48±0.14	3.09783e-05	4.43053e-06	1±0.03	1.52±0.07	2.42±0.12	0.000198043	3.11181e-06	1±0.07	1±0.05	1.17±0.06	0.946031	0.0428351
[4.27, 4.31]	triglycerides	1±0.02	0.93±0.03	0.81±0.02	0.362649	0.00223227	1±0.05	0.91±0.03	0.79±0.04	0.309403	0.00223227	1±0.06	0.95±0.03	0.97±0.04	0.831841	0.851398
[5.25, 5.38]	fatty acyl chain -HC=CH- UFA	1±0.05	0.99±0.05	0.9±0.06	0.98367	0.0267625	1±0.04	1.03±0.05	0.9±0.05	0.732218	0.0272399	1±0.06	1.05±0.06	1.01±0.07	0.797068	0.928195
[6.89, 6.91]	tyrosine	1±0.06	0.96±0.06	0.92±0.05	0.369811	0.0629677	1±0.07	0.97±0.06	0.95±0.05	0.667237	0.335983	1±0.07	1.03±0.05	1±0.06	0.831841	0.954725
[7.06, 7.08]	histidine	1±0.06	1.27±0.09	1.32±0.06	0.00778874	0.000622339	1±0.07	1.13±0.07	1.13±0.07	0.0937133	0.0487309	1±0.06	1.31±0.1	1.33±0.09	0.0454605	0.00541574
[7.31, 7.34]	phenylalanine	1±0.06	0.97±0.07	1±0.06	0.583728	0.990786	1±0.07	1±0.07	1±0.06	0.990786	0.990786	1±0.08	1.05±0.07	1.03±0.06	0.831841	0.851398
	Repeated measures two-way ANOVA with Sidak post hoc test. Benjamini-Hochberg method was used for p value adjustment to control the FDR across all variables.Sum normalised integral values were used for the analysis. Values presented in the table were normalised relative to the 0.5HR RT group for each type of plasma/serum. HDL, high-density lipoprotein. VLDL, very-low-density lipoprotein. MUFA, mon…
